# Supplementary material for: Solution of Monotone Complementarity and General Convex Programming Problems Using a Modified Potential Reduction Interior Point Method
Source: Atypon-hosted journal article supplement (doi:10.1287/ijoc.2016.0715), 2016-11-08
Supplement: ijoc.2016.0715-sm.pdf [file ijoc.2016.0715-sm.pdf]

Submitted to *INFORMS Journal on Computing*  
manuscript (Please, provide the manuscript number!)

Authors are encouraged to submit new papers to INFORMS journals by means of a style file template, which includes the journal title. However, use of a template does not certify that the paper has been accepted for publication in the named journal. INFORMS journal templates are for the exclusive purpose of submitting to an INFORMS journal and should not be used to distribute the papers in print or online or to submit the papers to another publication.

# Online Supplement for “Solution of Monotone Complementarity and General Convex Programming Problems Using a Modified Potential Reduction Interior Point Method”\*

Kuo-Ling Huang

Dept. of Industrial Engineering and Management Sciences, Northwestern University, Evanston, IL, 60208  
jupiters1117@northwestern.edu,

Sanjay Mehrotra

Dept. of Industrial Engineering and Management Sciences, Northwestern University, Evanston, IL, 60208  
mehrotra@iems.northwestern.edu,

---

\* The research of both authors was partially supported by grant DOE-SP0011568 and ONR N00014-09-10518, N00014-210051

## 1. Definitions

We consider a monotone complementarity problem (MCP) of the following form

$$s = f(x) \quad (1)$$

$$0 \leq s \perp x \geq 0, \quad (2)$$

where  $x, s \in R^n$ ,  $f(x)$  is a continuously differentiable monotone mapping from  $R_+^n := \{x \in R^n \mid x \geq 0\}$  to  $R^n$ , and the notation  $0 \leq s \perp x \geq 0$  means that  $(x, s) \geq 0$  and that  $x^T s = 0$ . This requirement is called the complementarity condition. Since  $f$  is a monotone mapping, for every  $x^1, x^2 \in R_+^n$ , we have

$$(x^1 - x^2)^T (f(x^1) - f(x^2)) \geq 0. \quad (3)$$

Let  $\nabla f(x)$  denote the Jacobian matrix of  $f(x)$ . If  $\nabla f(x)$  is positive semidefinite for all  $x > 0$ , that is,

$$h^T \nabla f(x) h \geq 0, \forall x > 0, h \in R^n,$$

then  $f(x)$  is a continuous monotone mapping.

Given an initial point  $(x^0, s^0) \in R_{++}^{2n} := \{x, s \in R^n \mid x, s > 0\}$ , we would like to compute a bounded sequence  $\langle x^k, s^k \rangle \in R_{++}^{2n}, k = 0, 1, \dots$ , such that

$$\lim_{k \rightarrow \infty} s^k - f(x^k) = 0. \quad (4)$$

If a limit point  $(x^*, s^*)$  of the sequence  $\langle x^k, s^k \rangle$  satisfies (4), then  $(x^*, s^*)$  is called an *asymptotically feasible* solution of MCP. If there exists an *asymptotically feasible* solution  $(x^*, s^*)$  such that  $(x^*)^T s^* = 0$ , then MCP is said to be asymptotically solvable. In this case  $(x^*, s^*)$  is called an *asymptotically optimal or complementary* solution. If MCP has an asymptotically complementary solution, then it has an *asymptotically maximal complementary solution*  $(x', s')$  where the number of positive components of  $(x', s')$  is maximal. On the other hand, if there is no sequence  $\langle x^k, s^k \rangle \in R_{++}^{2n}, k = 0, 1, \dots$ , that satisfies (4), then MCP is said to be *strongly infeasible*. We note that if there is no solution  $(x, s) \in R_+^{2n}$  that satisfies (1), then MCP is said to be *infeasible*.

Let  $X := \text{diag}(x_1, \dots, x_n)$ . We say that  $f$  satisfies a scaled Lipschitz condition (SLC) if there exists a monotone increasing function

$$\nu_f(\cdot) : (0, 1) \mapsto (1, \infty)$$

such that

$$\|X(f(x+h) - f(x) - \nabla f(x)h)\|_1 \leq \nu_f(\beta)h^T \nabla f(x)h, \quad (5)$$

whenever

$$h \in R^n, x \in R_{++}^n, \|X^{-1}h\|_\infty \leq \beta < 1.$$

## 2. Homogeneous formulation for the monotone complementarity problem

We consider an augmented homogeneous model related to MCP (HMCP):

$$s = \tau f(x/\tau), \quad (6)$$

$$\kappa = -x^T f(x/\tau), \quad (7)$$

$$0 \leq (s, \kappa) \perp (x, \tau) \geq 0. \quad (8)$$

Andersen and Ye (1999) showed statements 1–6 in the following theorem. Yoshise (2006) showed statement 7 in the more general setting of MCP over symmetric cones.

**THEOREM 1.** *Consider the MCP and the associated HMCP.*

1. *If  $\nabla f$  is positive semidefinite in  $R_+^n$ , then  $\nabla F$  is also positive semidefinite in  $R_{++}^{n+1}$ .*
2.  *$F$  is a continuous homogeneous function in  $R_{++}^{n+1}$  with degree 1 and for any  $(x, \tau) \in R_{++}^{n+1}$ , we have  $(x, \tau)^T F(x, \tau) = 0$ , and  $(x, \tau)^T \nabla F(x, \tau) = -F(x, \tau)^T$ .*
3. *If  $f$  is a continuous monotone mapping from  $R_+^n$  to  $R^n$ , then  $F$  is a continuous monotone mapping from  $R_{++}^{n+1}$  to  $R^{n+1}$ .*
4. *If  $f$  is scaled Lipschitz with  $\nu_f$ , then  $F$  is also scaled Lipschitz and it satisfies condition (5) with*

$$\nu_F(\beta) = \left(1 + \frac{2\nu_f(2\beta/(1-\beta))}{1-\beta}\right) \left(\frac{1}{1-\beta}\right),$$

whenever

$$(h_x, h_\tau) \in R^{n+1}, (x, \tau) \in R_{++}^{n+1}, \|X^{-1}h_x, \tau^{-1}h_\tau\|_\infty \leq \beta < 1/3.$$

5. *HMCP is (asymptotically) feasible, and every (asymptotically) feasible solution is an (asymptotically) complementary solution.*
6. *If  $\tau^* > 0$ , then  $(x^*/\tau^*, s^*/\tau^*)$  is an asymptotically complementary solution for MCP.*
7. *If MCP is strongly infeasible, then HMCP has an asymptotic solution with  $\kappa^* > 0$ . Conversely, if HMCP has an asymptotic solution  $(x^*, \tau^*, s^*, \kappa^*)$  with  $\kappa^* > 0$ , then MCP is infeasible, and  $(x^*/\kappa^*, s^*/\kappa^*)$  is a certificate to prove the infeasibility of MCP.*

For simplicity we let  $\bar{n} := n + 1, x := (x, \tau) \in R_+^{\bar{n}}$  and  $s := (s, \kappa) \in R_+^{\bar{n}}$ . Let

$$r^k := s^k - F(x^k),$$

and let  $(x^0, s^0) = e$  be the starting point, where  $e$  is the vector with all components equal to 1. Let  $\mathcal{C}(\hat{\mu})$  denote a continuous trajectory such that

$$\mathcal{C}(\hat{\mu}) := \{(x^k, s^k) \mid s^k - F(x^k) = \hat{\mu}r^0, X^k s^k = \hat{\mu}e, 0 < \hat{\mu} \leq 1\}.$$

At iteration  $k$  with iterate  $(x^k, s^k) > 0$ , define a Newton direction  $(d_x, d_s)$ , which is obtained by solving the following system of linear equations:

$$d_s - \nabla F(x^k)d_x = -\eta r^k, \quad (9)$$

$$X^k d_s + S^k d_x = \gamma \mu^k e - X^k s^k. \quad (10)$$

Here  $\eta, \gamma \in [0, 1]$ , and  $\mu^k := \frac{(x^k)^T s^k}{\bar{n}}$ . For a step size  $\alpha > 0$ , let the new iterate be

$$x^+ := x^k + \alpha d_x > 0, \quad \text{and}$$

$$s^+ := s^k + \alpha d_s + (F(x^+) - F(x^k) - \alpha \nabla F(x^k)d_x) = F(x^+) + (1 - \alpha\eta)r^k > 0. \quad (11)$$

Andersen and Ye (1999) showed the following lemmas.

LEMMA 1. *The direction  $(d_x, d_s)$  satisfies  $d_x^T d_s = d_x^T \nabla F(x^k)d_x + \eta(1 - \gamma - \eta)\bar{n}\mu^k$ .*

LEMMA 2. *Let  $r^+ = s^+ - F(x^+)$ , and consider the new iterate  $(x^+, s^+)$  given by (9)–(11).*

*Then,*

(i)  $r^+ = (1 - \alpha\eta)r^k,$

(ii)  $(x^+)^T s^+ = (x^k)^T s^k(1 - \alpha(1 - \gamma)) + \alpha^2\eta(1 - \eta - \gamma)\bar{n}\mu^k.$

### 3. A practical potential reduction homogeneous algorithm

We consider the following potential function for the HMCP.

$$\Phi_\rho(x, s) := (\rho/2) \log \{(x^T s)^2 + \theta \|r\|^2\} - \sum_{j=1}^{\bar{n}} \log x_j s_j, \quad (12)$$

where  $\theta$  is a constant parameter with positive value and  $\rho \geq \bar{n} + \sqrt{\bar{n}}$ .

To develop a practical potential reduction IPM, we impose the following condition on the iterates.

CONDITION 1.

- (i)  $\lambda \leq \frac{(\tilde{x}^+)^T \tilde{s}^+}{(x^+)^T s^+} \leq \Lambda$ , and  $\lambda \leq \frac{(x^0)^T s^0 |r_j^k|}{(x^k)^T s^k |r_j^0|} \leq \Lambda$ ,  $j = 1, \dots, \bar{n}$ ,  
 (ii)  $\Phi_{\bar{n}}(x^k, s^k) \leq \iota$ ,

where  $\lambda$ ,  $\Lambda$ , and  $\iota$  are given positive constants. Condition 1 (i) requires that the complementarity at the iterate  $(\tilde{x}^+, \tilde{s}^+)$  generated using a favored direction and the theoretical iterate  $(x^+, s^+)$  are of the same order, and that the overall decrease in the infeasibility to complementarity ratio is maintained in Algorithm 1. Condition 1 (ii) requires the potential function (12) with parameter  $\rho = \bar{n}$  is upper bounded by a constant amount. Note that if  $\eta = 1 - \gamma$ , then from Lemma 2 we have  $(x^+)^T s^+ = (1 - \alpha\eta)(x^k)^T s^k$ . As a result for the Newton direction, Condition 1 (i) is satisfied with  $\lambda, \Lambda = 1$ . Andersen and Ye (1999) shows that Condition 1 (i) is also satisfied by the Newton direction with appropriate step size. Convergence properties for an algorithm that has the additional flexibility of choosing more aggressive directions and step sizes is ensured under Condition 1.

Starting from an initial solution  $(x^0, s^0) > 0$ , our basic potential reduction IPM is now given as Algorithm 1. Note that Step 4 of Algorithm 1 checks if: (i) the reduction of the potential function is satisfactory; (ii) Condition 1 is satisfied. We note that the first safeguard guarantees global linear and polynomial time convergence properties, whereas the other safeguards make sure that the algorithm generates a maximal complementary solution of desired precision. Note that parameter  $\zeta$  specifies the minimum reduction in the potential function at each iteration, and parameter  $\iota$  specifies an upper bound on  $\phi_{\bar{n}}(\cdot, \cdot)$ . We note that this algorithm has the freedom in choosing a search direction  $\tilde{p}_x$  and  $\tilde{p}_s$ , and it allows different step sizes in the primal and dual spaces.

#### 4. Convergence of the practical potential reduction homogeneous algorithm

We need to analyze the worst case decrease in (12) at each iteration of our potential reduction interior point method (IPM). Let

$$\begin{aligned} S^k &:= \text{diag}(s_1^k, \dots, s_{\bar{n}}^k), \quad D := (X^k S^k)^{0.5}, \quad D_{\min} := \min_{j=1, \dots, \bar{n}} (x_j^k s_j^k)^{0.5}, \\ p &:= \frac{\bar{n}}{\rho} \mu^k e - D^2 e = \frac{x^k{}^T s^k}{\rho} e - D^2 e, \quad \text{and } \alpha := \beta \frac{D_{\min}}{\|D^{-1} p\|}, \end{aligned} \quad (13)$$

where  $\beta \in (0, 1/3)$  is a positive constant. Suppose  $(d_x, d_s)$  is computed by solving the system of linear equations (9) and (10) with  $\eta = 1 - \gamma$  and  $\gamma = \frac{\bar{n}}{\rho}$ . Let

$$p_x := \alpha d_x,$$

---

**Algorithm 1** Practical potential reduction IPM

---

Input: An initial solution  $(x^0, s^0) > 0$ , constants  $\zeta < 0$  and  $\iota > 0$ .Output: An (asymptotically) maximal complementary solution  $(x^k, s^k)$ .

- 1: Let  $k = 0$ .
  - 2: **while** The termination criteria are not met **do**
  - 3:   Compute  $(\tilde{x}^+, \tilde{s}^+)$  using  $\tilde{p}_x, \tilde{p}_s$  for  $x^k$  and  $s^k$ .
  - 4:   **if**  $\Phi_\rho(\tilde{x}^+, \tilde{s}^+) - \Phi_\rho(x^k, s^k) \leq \zeta$  and Condition 1 is satisfied, **then**
  - 5:     Set  $(x^{k+1}, s^{k+1}) := (\tilde{x}^+, \tilde{s}^+)$ .
  - 6:   **else**
  - 7:     Compute  $(x^+, s^+)$  using the Newton direction  $(d_x, d_s)$  with an appropriate step size  $\alpha$ .
  - 8:     Set  $(x^{k+1}, s^{k+1}) := (x^+, s^+)$ .
  - 9:   **end if**
  - 10:   Set  $k := k + 1$ .
  - 11: **end while**
- 

$$\begin{aligned}
p_s &:= \alpha d_s + (F(x^+) - F(x^k) - \alpha \nabla F(x^k) d_x), \\
z &:= X^k (F(x^+) - F(x^k) - \nabla F(x^k) p_x), \quad \text{and} \\
q &:= z / \alpha,
\end{aligned} \tag{14}$$

where

$$x^+ := x^k + p_x > 0, \quad \text{and} \quad s^+ := s^k + p_s > 0.$$

We have

$$p = \gamma \mu^k e - D^2 e = X^k d_s + S^k d_x, \tag{15}$$

and

$$X^k p_s + S^k p_x - \alpha p = z = \alpha q. \tag{16}$$

Now suppose  $\tilde{p}_x, \tilde{p}_s$  be any search direction associated with unequal step sizes in the primal and dual spaces. We let

$$\tilde{x}^+ := x^k + \tilde{p}_x > 0, \quad \text{and} \quad \tilde{s}^+ := s^k + \tilde{p}_s > 0.$$

The following analysis follows some of the steps in Kojima et al. (1991) and in (Potra and Ye 1996, Sections 2 and 3). We drop the index  $k$  for an iteration to simplify the presentation.

PROPOSITION 1 (**Kojima et al. (1991), Lemma 2.3**). *Let  $u, v$ , and  $w \in R^{\bar{n}}$  satisfy  $u + v = w$  and  $u^T v \geq 0$ . Then*

$$\|u\| \leq \|w\|, \|v\| \leq \|w\|, \text{ and } u^T v \leq \frac{1}{2}\|w\|^2.$$

LEMMA 3. *Let  $p_x$  be defined as in (14). Then,  $\|X^{-1}p_x\|_{\infty} \leq \beta$ .*

*Proof.* We use the technique in Kojima et al. (1991) for the proof. We first rewrite equation (15) as

$$\frac{D^{-1}Xd_s}{\|D^{-1}p\|} + \frac{D^{-1}Sd_x}{\|D^{-1}p\|} = \frac{D^{-1}p}{\|D^{-1}p\|}. \quad (17)$$

From Lemma 1, we have

$$\frac{(D^{-1}Xd_s)^T D^{-1}Sd_x}{\|D^{-1}p\|\|D^{-1}p\|} = \frac{d_x^T d_s}{\|D^{-1}p\|^2} \geq 0. \quad (18)$$

Now using Proposition 1 in (17) and (18), we have

$$\frac{\|D^{-1}Sd_x\|}{\|D^{-1}p\|} \leq \frac{\|D^{-1}p\|}{\|D^{-1}p\|} = 1. \quad (19)$$

Using (13) and (19), we deduce the following relation

$$\frac{\|X^{-1}d_x\|}{\|D^{-1}p\|} = \frac{\|D^{-2}Sd_x\|}{\|D^{-1}p\|} \leq D_{\min}^{-1}. \quad (20)$$

Finally, using (13) and (20), we have

$$\|X^{-1}p_x\|_{\infty} = \alpha\|X^{-1}d_x\|_{\infty} \leq \beta D_{\min} \frac{\|X^{-1}d_x\|}{\|D^{-1}p\|} \leq \beta.$$

□

Potra and Ye (1996) showed the following lemma.

LEMMA 4 (**Potra and Ye (1996), Theorem 3.2**). *If  $d_x$  and  $d_s$  are the solution of the linear system (16), and if SLC condition (5) and Lemma 3 are satisfied, then*

$$\|z\| \leq \xi\beta^2 D_{\min}^2,$$

where  $\xi = 0.25\nu_F(\beta)$  and  $z$  is defined in (14).

From the above lemma and (13) we have

$$\|D^{-1}q\| \leq \|q\|D_{\min}^{-1} = \frac{\|z\|}{\alpha}D_{\min}^{-1} \leq \frac{\xi\beta^2}{\alpha}D_{\min} = \xi\beta\|D^{-1}p\|. \quad (21)$$

Kojima et al. showed the following lemma.

LEMMA 5 (**Kojima et al. (1991), Lemma 2.5**). Suppose the search direction  $(d_x, d_s)$  is computed by solving the system of linear equations (9) and (10) with  $\eta = 1 - \gamma$  and  $\gamma = \frac{\bar{n}}{\rho}$  ( $\rho \geq \bar{n} + \sqrt{\bar{n}}$ ), then

$$\frac{\rho}{x^T s} \|D^{-1}p\| = \left\| D^{-1}e - \frac{\rho}{x^T s} De \right\| \geq \frac{\sqrt{3}}{2} D_{\min}^{-1}.$$

In the following we define two real valued functions  $g_1$  and  $g_2$ , and establish results on their upper bounds. These two functions and the related upper bounds will be used later in our analysis. Let

$$g_1 := -\alpha\rho\eta - e^T (X^{-1}p_x + S^{-1}p_s) \quad \text{and} \quad (22)$$

$$g_2 := \frac{\|X^{-1}p_x\|^2 + \|S^{-1}p_s\|^2}{2(1 - \beta(1 + \xi\beta))}. \quad (23)$$

LEMMA 6. Let  $g_1$  be defined as in (22). Suppose the search direction  $(d_x, d_s)$  is computed by solving the system of linear equations (9) and (10) with  $\eta = 1 - \gamma$  and  $\gamma = \frac{\bar{n}}{\rho}$  ( $\rho \geq \bar{n} + \sqrt{\bar{n}}$ ). Let the step size  $\alpha$  be defined as in (13). If SLC condition (5) (i) is satisfied, with a suitably chosen parameter  $\beta \in (0, 1/3)$ , then we have

$$g_1 \leq -\frac{\sqrt{3}}{2}(1 - \xi\beta)\beta + \xi\beta^2 \frac{\rho}{\sqrt{\bar{n}}}.$$

*Proof.* From (10) and  $\gamma = 1 - \eta$ , we have

$$-\alpha\rho\eta = \alpha\rho \frac{x^T d_s + s^T d_x}{\bar{n}\mu}. \quad (24)$$

An upper bound of  $g_1$  is obtained in the following set of inequalities.

$$\begin{aligned} g_1 &= \alpha\rho \left( \frac{x^T d_s + s^T d_x}{x^T s} \right) - e^T (X^{-1}p_x + S^{-1}p_s) \\ &= \alpha \frac{\rho}{x^T s} e^T (X d_s + S d_x) - e^T D^{-2} (X p_s + S p_x) \\ &= \alpha \frac{\rho}{x^T s} e^T \left( p - \frac{x^T s}{\rho} D^{-2} (p + q) \right) \quad (\text{using (15) and (16)}) \\ &= \alpha \frac{\rho}{x^T s} e^T \left( \left( D - \frac{x^T s}{\rho} D^{-1} \right) D^{-1} p - \frac{x^T s}{\rho} D^{-2} q \right) \\ &= -\alpha \frac{\rho}{x^T s} (p^T D^{-1} D^{-1} p) - \alpha \frac{\rho}{x^T s} (D^{-1} p + De)^T D^{-1} q \quad (\text{using (13)}) \\ &= -\alpha \frac{\rho}{x^T s} (p^T D^{-1} D^{-1} (p + q)) - \alpha \frac{\rho}{x^T s} e^T q \\ &= -\alpha \frac{\rho}{x^T s} (\|D^{-1}p\|^2 + p^T D^{-1} D^{-1} q) - \frac{\rho}{x^T s} e^T z \quad (\text{using (14)}) \end{aligned}$$

$$\begin{aligned}
 &\leq -\alpha \frac{\rho}{x^T s} (\|D^{-1}p\|^2 - \|D^{-1}p\| \|D^{-1}q\|) + \frac{\rho}{x^T s} \|z\|_1 \\
 &\leq -\alpha \frac{\rho}{x^T s} (\|D^{-1}p\|^2 - \xi\beta \|D^{-1}p\|^2) + \frac{\rho}{x^T s} \sqrt{\bar{n}} \|z\| \quad (\text{using (21)}) \\
 &\leq -\alpha \frac{\rho}{x^T s} (1 - \xi\beta) \|D^{-1}p\|^2 + \frac{\rho}{x^T s} \sqrt{\bar{n}} \xi \beta^2 D_{\min}^2 \quad (\text{using Lemma 4}) \\
 &\leq -\frac{\sqrt{3}}{2} (1 - \xi\beta) \alpha D_{\min}^{-1} \|D^{-1}p\| + \frac{\rho}{\sqrt{\bar{n}}} \xi \beta^2 \quad (\text{using Lemma 5}) \\
 &= -\frac{\sqrt{3}}{2} (1 - \xi\beta) \beta + \frac{\rho}{\sqrt{\bar{n}}} \xi \beta^2. \quad (\text{using (13)})
 \end{aligned}$$

□

LEMMA 7. Let  $g_2$  be defined as in (23). Under the hypothesis of Lemma 6, we have

$$g_2 \leq \frac{\beta^2(1 + \xi\beta)^2}{2(1 - \beta(1 + \xi\beta))}.$$

*Proof.* The following proof is based on techniques in Potra and Ye (1996). We have

$$\begin{aligned}
 2(1 - \beta(1 + \xi\beta))g_2 &= \|X^{-1}p_x\|^2 + \|S^{-1}p_s\|^2 \tag{25} \\
 &= \|D^{-2}Xp_s\|^2 + \|D^{-2}Sp_x\|^2 \\
 &\leq D_{\min}^{-2} (\|D^{-1}Xp_s\|^2 + \|D^{-1}Sp_x\|^2) \\
 &= D_{\min}^{-2} (\|D^{-1}(Xp_s + Sp_x)\|^2 - 2p_x^T p_s) \\
 &= D_{\min}^{-2} (\alpha^2 \|D^{-1}(p + q)\|^2 - 2p_x^T p_s) \quad (\text{using (16)}) \\
 &\leq D_{\min}^{-2} (\alpha^2 (\|D^{-1}p\| + \|D^{-1}q\|)^2 - 2p_x^T p_s) \\
 &\leq D_{\min}^{-2} (\alpha^2 (1 + \xi\beta)^2 \|D^{-1}p\|^2 - 2p_x^T p_s) \quad (\text{using (21)}) \\
 &= (\alpha D_{\min}^{-1} \|D^{-1}p\|)^2 (1 + \xi\beta)^2 - 2D_{\min}^{-2} p_x^T p_s \\
 &= \beta^2(1 + \xi\beta)^2 - 2D_{\min}^{-2} p_x^T p_s. \quad (\text{using (13)})
 \end{aligned}$$

The lower bound on  $p_x^T p_s$  is obtained as follows.

$$\begin{aligned}
 p_x^T p_s &= p_x^T (\alpha d_s + (F(x^+) - F(x) - \nabla F(x)p_x)) \quad (\text{using (14)}) \tag{26} \\
 &= (x^+ - x)^T (F(x^+) - F(x)) + \alpha^2 (d_x^T d_s - d_x^T \nabla F(x) d_x) \quad (\text{using (14)}) \\
 &= (x^+ - x)^T (F(x^+) - F(x)) + \alpha^2 \eta (1 - \eta - \gamma) \bar{n} \mu \quad (\text{using Lemma 1}) \\
 &\geq 0 \quad (\text{from the monotonicity of } F).
 \end{aligned}$$

The result follows from using (25) and (26). □

The following proposition is frequently used in the IPM analysis.

**PROPOSITION 2 (Karmarkar (1984)).**

1. If  $1 - \delta > 0$ , then  $\log \{1 - \delta\} \leq -\delta$ .
2. If  $\delta \in R^{\bar{n}}$  satisfies  $\|\delta\|_{\infty} \leq v < 1$ , then  $\sum_{j=1}^{\bar{n}} \log \{1 - \delta_j\} \geq -e^T \delta - \frac{\|\delta\|^2}{2(1-v)}$ .

Now we are ready to show a bound on the difference between the potential function values  $\Phi_{\rho}(x^+, s^+)$  and  $\Phi_{\rho}(x, s)$ . Theorem 2 bounds the improvement in the potential function by taking the theoretical direction with a controllable step size.

**THEOREM 2.** Let  $\xi = 0.25\nu_F(\beta) \geq 0.25$ . Suppose the search direction  $(d_x, d_s)$  is computed by solving the system of linear equations (9) and (10) with  $\eta = 1 - \gamma$  and  $\gamma = \frac{\bar{n}}{\rho} (\rho \geq \bar{n} + \sqrt{\bar{n}})$ . Let the step size  $\alpha$  be defined as in (13). If SLC condition (5) is satisfied, and  $\beta \in (0, 1/3)$  is chosen such that

$$\xi\beta \leq \frac{\sqrt{3}}{4(\sqrt{3} + 2\rho/\sqrt{\bar{n}})}, \quad \text{and} \quad (27)$$

$$\beta\sqrt{\xi}(1 + \xi\beta) \leq \frac{\sqrt{3}}{2(\sqrt{3} + 2\rho/\sqrt{\bar{n}})^{1/2}}, \quad (28)$$

then,  $(x^+, s^+)$  is strictly positive. Moreover,

$$\Phi_{\rho}(x^+, s^+) - \Phi_{\rho}(x, s) \leq -0.2 \frac{\beta}{1 - \beta}.$$

*Proof.* We first show that  $(x^+, s^+)$  is strictly positive. From Lemma 7 and (28), we have

$$\max \{ \|X^{-1}p_x\|_{\infty}, \|S^{-1}p_s\|_{\infty} \} \leq \beta(1 + \xi\beta) \leq \frac{\sqrt{3}}{2(\xi(\sqrt{3} + 2\rho/\sqrt{\bar{n}}))^{1/2}} < 1.$$

Hence,  $(x^+, s^+)$  is valid. We note that from Lemma 3, we have

$$\|X^{-1}p_x\|_{\infty} \leq \beta \leq \frac{\sqrt{3}}{4\xi(\sqrt{3} + 2\rho/\sqrt{\bar{n}})} \leq \frac{\sqrt{3}}{2(\xi(\sqrt{3} + 2\rho/\sqrt{\bar{n}}))^{1/2}}.$$

Therefore, the upper bound from Lemma 3 is still valid (and tighter). Now,

$$\begin{aligned} & \Phi_{\rho}(x^+, s^+) - \Phi_{\rho}(x, s) \\ &= (\rho/2) \log \{ (1 - \alpha\eta)^2 ((\bar{n}\mu)^2 + \|r\|^2) \} - \sum_{j=1}^{\bar{n}} \log \{ (x_j + (p_x)_j)(s_j + (p_s)_j) \} \end{aligned}$$

$$\begin{aligned}
 & -(\rho/2) \log \{(\bar{n}\mu)^2 + \|r\|^2\} + \sum_{j=1}^{\bar{n}} \log \{x_j s_j\} \quad (\text{using Lemma 2}) \\
 = & \rho \log \{1 - \alpha\eta\} - \sum_{j=1}^{\bar{n}} \log \left\{ 1 + \frac{(p_x)_j}{x_j} \right\} \left\{ 1 + \frac{(p_s)_j}{s_j} \right\} \\
 \leq & -\alpha\rho\eta - e^T (X^{-1}p_x + S^{-1}p_s) + \frac{\|X^{-1}p_x\|^2 + \|S^{-1}p_s\|^2}{2(1 - \beta(1 + \xi\beta))} \quad (\text{using Proposition 2}) \\
 = & g_1 + g_2. \quad (\text{using (22) and (23)})
 \end{aligned}$$

From Lemmas 6 and 7, we write

$$\begin{aligned}
 \Phi_\rho(x^+, s^+) - \Phi_\rho(x, s) & \leq -\frac{\sqrt{3}}{2}(1 - \xi\beta)\beta + \xi\beta^2\rho/\sqrt{\bar{n}} + \frac{\beta^2(1 + \xi\beta)^2}{2(1 - \beta(1 + \xi\beta))} \\
 & = \frac{\beta^2(1 + \xi\beta)^2}{2(1 - \beta(1 + \xi\beta))} + \beta \left( -\frac{\sqrt{3}}{2} + \xi\beta \left( \frac{\sqrt{3}}{2} + \frac{\rho}{\sqrt{\bar{n}}} \right) \right) \\
 & = \frac{\beta^2(1 + \xi\beta)^2}{2(1 - \beta(1 + \xi\beta))} - \frac{\sqrt{3}}{2}\beta \left( 1 - \xi\beta \left( \frac{\sqrt{3} + 2(\rho/\sqrt{\bar{n}})}{\sqrt{3}} \right) \right) =: \zeta.
 \end{aligned}$$

It follows that

$$\begin{aligned}
 2\frac{(1 - \beta(1 + \xi\beta))}{\beta}\zeta & = \beta(1 + \xi\beta)^2 - \sqrt{3}(1 - \beta(1 + \xi\beta)) \left( 1 - \xi\beta \left( \frac{\sqrt{3} + 2(\rho/\sqrt{\bar{n}})}{\sqrt{3}} \right) \right) \\
 & \leq \beta(1 + 0.076)^2 - \sqrt{3}(3/4)(1 - \beta(1 + \xi\beta)) \quad (\text{using (27) and } \rho/\sqrt{\bar{n}} \geq 2) \\
 & \leq -0.4.
 \end{aligned}$$

Hence, we have

$$\zeta \leq -0.2 \frac{\beta}{1 - 2\beta}. \quad (29)$$

□

Since  $\nu_F(\beta) : (0, 1/3) \mapsto (1, \infty)$  is a monotone increasing function depending on  $\beta$ , we can always choose a sufficiently small  $\beta$  that satisfies (27) and (28). As a result, a reduction in the potential function ( $\zeta \leq -0.2 \frac{\beta}{1 - 2\beta}$ ) is guaranteed. However, choosing  $\beta$  is dependent on  $\nu_F(\beta)$ , and finding a maximal  $\beta$  that satisfies (27) and (28) requires the knowledge of the scaled Lipschitz constant  $\nu_F(\beta)$ , which may not be available in practice for an arbitrary convex function. Problems satisfying the scaled Lipschitz condition are discussed in Monteiro and Adler (1990), Potra and Ye (1993), Zhu (1992). Nevertheless, the analysis suggests that for an appropriate step size, the potential function value will reduce as long as the scaled Lipschitz constant is bounded. Consequently, the potential function can be

used as a guide to solve monotone complementarity and convex optimization problems satisfying this property. If the condition is not satisfied, then lack of sufficient reduction in the potential function indicates that the algorithm proposed here is not appropriate for the problem being solved. Finally, we note that Theorem 2 is similar to the result by Potra and Ye (1996), but with the difference that it allows us to choose a larger  $\rho$ , when  $\beta$  is sufficiently small.

In the following we will show that if potential function (12) can be reduced by at least a constant at each iteration, then Algorithm 1 generates an  $\epsilon$ -complementary solution in polynomial time. Our analysis follows some of the steps in Güler and Ye (1993), Kojima et al. (1991), and Potra and Ye (1996).

**THEOREM 3.** *Let  $\epsilon > 0$ . Starting from a solution  $(x^0, s^0) > 0$ , if the value of potential function (12) can be reduced by at least a constant amount and if Condition 1 is satisfied at each iteration of Algorithm 1 then after at most  $\mathcal{O}(\Phi_\rho(x^0, s^0) - \bar{n} \log \bar{n} + (\rho - \bar{n}) |\log \epsilon|)$  iterations, we will have a solution such that*

$$x^T s \leq \epsilon \quad \text{and} \quad \frac{|r_j|}{|r_j^0|} \leq \Lambda \frac{x^T s}{(x^0)^T s^0}, \quad j = 1, \dots, \bar{n}. \quad (30)$$

*Proof.* Using Condition 1 (i), we have

$$(\rho/2) \log \left\{ (x^T s)^2 \left( 1 + \left( \lambda \frac{\|r^0\|}{(x^0)^T s^0} \right)^2 \right) \right\} - \sum_{j=1}^{\bar{n}} \log x_j s_j \leq \Phi_\rho(x, s),$$

which implies

$$\begin{aligned} & (\rho - \bar{n}) \log x^T s - \sum_{j=1}^{\bar{n}} \log \left\{ \frac{\bar{n} x_j s_j}{x^T s} \right\} + (\rho/2) \log \left\{ 1 + \left( \lambda \frac{\|r^0\|}{(x^0)^T s^0} \right)^2 \right\} \\ & \leq \Phi_\rho(x, s) - \bar{n} \log \bar{n}. \end{aligned} \quad (31)$$

We note that the second term of (31) is nonnegative due to arithmetic and geometric mean inequality, and obviously the third term is positive. Hence, it follows that

$$(\rho - \bar{n}) \log x^T s \leq \Phi_\rho(x, s) - \bar{n} \log \bar{n}.$$

Therefore, after at most  $\mathcal{O}(\Phi_\rho(x^0, s^0) - \bar{n} \log \bar{n} + (\rho - \bar{n}) |\log \epsilon|)$  iterations, we have  $\Phi_\rho(x, s) \leq \bar{n} \log \bar{n} - (\rho - \bar{n}) |\log \epsilon|$ , and hence

$$x^T s \leq \epsilon.$$

Moreover, Condition 1 (i) implies that

$$\frac{|r_j|}{|r_j^0|} \leq \Lambda \frac{x^T s}{(x^0)^T s^0}, \quad j = 1, \dots, \bar{n}.$$

□

We now show that any limit point of a sequence  $\langle x^k, s^k \rangle$  generated by Algorithm 1 is an asymptotically maximal complementary solution. Our analysis here follows some of the steps in (Güler and Ye 1993, Sections 2 and 4) and (Potra and Ye 1996, Section 4).

In the following analysis, we suppose Algorithm 1 is used from an initial positive point  $(x^0, s^0)$ . Recall that at iterate  $(x^k, s^k)$ ,  $(\tilde{x}^+, \tilde{s}^+)$  is a tentative point computed using any favored search direction using different step sizes in the primal and dual spaces, and it satisfies Condition 1; whereas  $(x^+, s^+)$  is computed using the Newton direction  $(d_x, d_s)$  and a fixed step size  $\alpha$ . The proof of Lemma 8 only uses the fact that  $\Phi_\rho(\cdot, \cdot)$  is reduced by an amount  $\zeta$ , and is independent of the source of this reduction.

LEMMA 8. *Let  $\lambda$  and  $\Lambda$  be defined in Condition 1,*

$$C_1 := \frac{\rho - \bar{n}}{2} \log \left\{ \frac{((x^0)^T s^0)^2 + \Lambda^2 \|r^0\|^2}{((x^0)^T s^0)^2 + \lambda^2 \|r^0\|^2} \right\} \geq 0, \quad \text{and}$$

$$C_2 := C_1 + \max \{0, -(\rho - \bar{n}) \log \lambda\} \geq 0.$$

Then,

$$\Phi_{\bar{n}}(x^+, s^+) - \Phi_{\bar{n}}(x^k, s^k) \leq \zeta - (\rho - \bar{n}) \log \left\{ 1 - D_{\min}^2 \frac{\sqrt{\bar{n}}}{(x^k)^T s^k} \right\}, \quad \text{and} \quad (32)$$

$$\Phi_{\bar{n}}(\tilde{x}^+, \tilde{s}^+) - \Phi_{\bar{n}}(x^k, s^k) \leq \zeta - (\rho - \bar{n}) \log \left\{ 1 - D_{\min}^2 \frac{\sqrt{\bar{n}}}{(x^k)^T s^k} \right\} + C_2, \quad (33)$$

where  $\Phi_{\bar{n}}(x^k, s^k)$  is defined as in (12) with  $\rho = \bar{n}$ , and  $\zeta$  is the reduction on the potential function required in Step 4 of Algorithm 1.

*Proof.* To simplify the presentation we drop the index  $k$ . Let  $\tilde{r}^+ = \tilde{s}^+ - F(\tilde{x}^+)$ . Using Condition 1 (i), we have

$$\|\tilde{r}^+\|^2 \geq \left( \lambda \|r^0\| \frac{(\tilde{x}^+)^T \tilde{s}^+}{(x^0)^T s^0} \right)^2, \quad \|r\|^2 \leq \left( \Lambda \|r^0\| \frac{x^T s}{(x^0)^T s^0} \right)^2, \quad \text{and} \quad (34)$$

$$(\tilde{x}^+)^T \tilde{s}^+ \geq \lambda (x^+)^T s^+. \quad (35)$$

First we bound the difference between the values of  $\Phi_{\bar{n}}(\tilde{x}^+, \tilde{s}^+)$  and  $\Phi_{\bar{n}}(x, s)$ .

$$\begin{aligned}
& \Phi_{\bar{n}}(\tilde{x}^+, \tilde{s}^+) - \Phi_{\bar{n}}(x, s) \\
&= \Phi_{\rho}(\tilde{x}^+, \tilde{s}^+) - \Phi_{\rho}(x, s) - \Phi_{\rho}(\tilde{x}^+, \tilde{s}^+) + \Phi_{\rho}(x, s) + \Phi_{\bar{n}}(\tilde{x}^+, \tilde{s}^+) - \Phi_{\bar{n}}(x, s) \\
&\leq \zeta - \frac{\rho - \bar{n}}{2} \log \left\{ ((\tilde{x}^+)^T \tilde{s}^+)^2 + \|\tilde{r}^+\|^2 \right\} \\
&\quad + \frac{\rho - \bar{n}}{2} \log \left\{ (x^T s)^2 + \|r\|^2 \right\} \text{ (using sufficient reduction condition in Step 4 of Algorithm 1)} \\
&\leq \zeta - \frac{\rho - \bar{n}}{2} \log \left\{ ((\tilde{x}^+)^T \tilde{s}^+)^2 + \left( \lambda \|r^0\| \frac{(\tilde{x}^+)^T \tilde{s}^+}{(x^0)^T s^0} \right)^2 \right\} \\
&\quad + \frac{\rho - \bar{n}}{2} \log \left\{ (x^T s)^2 + \left( \Lambda \|r^0\| \frac{x^T s}{(x^0)^T s^0} \right)^2 \right\} \text{ (using (34))} \\
&= \zeta - (\rho - \bar{n}) \log \left\{ \frac{(\tilde{x}^+)^T \tilde{s}^+}{x^T s} \right\} + C_1 \\
&\leq \zeta - (\rho - \bar{n}) \log \left\{ \frac{(x^+)^T s^+}{x^T s} \right\} - (\rho - \bar{n}) \log \lambda + C_1 \text{ (using (35))} \\
&\leq \zeta - (\rho - \bar{n}) \log \left\{ \frac{(x^+)^T s^+}{x^T s} \right\} + C_2 \\
&= \zeta - (\rho - \bar{n}) \log \{1 - \alpha \eta\} + C_2 \text{ (using Lemma 2)} \\
&= \zeta - (\rho - \bar{n}) \log \left\{ 1 + \alpha \frac{x^T d_s + s^T d_s}{x^T s} \right\} + C_2 \text{ (using (24))} \\
&= \zeta - (\rho - \bar{n}) \log \left\{ 1 + \alpha \frac{p^T e}{x^T s} \right\} + C_2 \text{ (using (15))}.
\end{aligned}$$

Now,

$$\begin{aligned}
\alpha \frac{p^T e}{x^T s} &= \frac{\alpha ((x^T s / \rho) e^T e - e^T D^2 e)}{x^T s} \text{ (using (13))} \\
&= \alpha \left( \frac{\bar{n}}{\rho} - 1 \right) \\
&= -\beta \frac{D_{\min}}{\|D^{-1} p\|} \left( \frac{\rho - \bar{n}}{\rho} \right) \text{ (using (13))} \\
&\geq -\beta D_{\min}^2 \frac{2(\rho - \bar{n})}{\sqrt{3} x^T s} \text{ (using Lemma 5)} \\
&\geq -D_{\min}^2 \frac{\sqrt{\bar{n}}(\rho - \bar{n})}{2x^T s \xi (\sqrt{3\bar{n}} + 2\rho)} \text{ (using (27))} \\
&\geq -D_{\min}^2 \frac{2\rho\sqrt{\bar{n}}}{x^T s (\sqrt{3\bar{n}} + 2\rho)} \text{ (because } \xi = 0.25\nu_F\beta \geq 0.25) \\
&\geq -D_{\min}^2 \frac{\sqrt{\bar{n}}}{x^T s}.
\end{aligned}$$

Therefore,

$$\Phi_{\bar{n}}(\tilde{x}^+, \tilde{s}^+) - \Phi_{\bar{n}}(x, s) \leq \zeta - (\rho - \bar{n}) \log \left\{ 1 - D_{\min}^2 \frac{\sqrt{\bar{n}}}{x^T s} \right\} + C_2.$$

The difference between the values of  $\Phi_{\bar{n}}(x^+, s^+)$  and  $\Phi_{\bar{n}}(x, s)$  can be constructed in a similar way.  $\square$

The following lemma shows that  $\Phi_{\bar{n}}(x^k, s^k)$  remains bounded at all iterates of Algorithm 1.

LEMMA 9. *There is a constant  $M_1$  independent of  $k$  such that*

$$\Phi_{\bar{n}}(x^k, s^k) \leq M_1 \text{ for all } k,$$

where

$$M_1 = \max \left\{ \iota \bar{n} \log \bar{n} - (\rho - \bar{n}) \log \left\{ 1 - \frac{1}{\sqrt{\bar{n}}} \right\} + C_2 + C_3, \Phi_{\bar{n}}(x^0, s^0) \right\}.$$

*Proof.* The index  $k$  is dropped for simplification. Let  $C_3 := (\bar{n}/2) \log \left\{ 1 + \left( \Lambda \frac{\|r^0\|}{(x^0)^T s^0} \right)^2 \right\} > 0$ . Using (34), we have

$$\begin{aligned} \Phi_{\bar{n}}(x, s) &= (\bar{n}/2) \log \left\{ (x^T s)^2 + \|r\|^2 \right\} - \sum_{j=1}^{\bar{n}} \log x_j s_j \\ &\leq (\bar{n}/2) \log \left\{ (x^T s)^2 + \left( \Lambda \|r^0\| \frac{x^T s}{(x^0)^T s^0} \right)^2 \right\} - \sum_{j=1}^{\bar{n}} \log x_j s_j \\ &= \bar{n} \log x^T s - \sum_{j=1}^{\bar{n}} \log x_j s_j + C_3. \end{aligned} \tag{36}$$

Recall that  $\phi_{\bar{n}}(x, s) = \bar{n} \log x^T s - \sum_{j=1}^{\bar{n}} \log x_j s_j$  corresponds to the feasible potential function. In the following we analyze the behavior of  $\phi_{\bar{n}}(x, s)$ . Let  $\iota > 0$  be sufficiently large (e.g., as given in Table 1) so that

$$\zeta - (\rho - \bar{n}) \log \left\{ 1 - \frac{1}{\bar{n}^{\iota-0.5}} \right\} < 0, \tag{37}$$

where  $\zeta$  is defined as in (29). We now consider the following two cases:

1.  $\phi_{\bar{n}}(x, s) \geq \iota \bar{n} \log \bar{n}$ ;
2.  $\phi_{\bar{n}}(x, s) \leq \iota \bar{n} \log \bar{n}$ .

We will show that in the first case, the value of  $\Phi_{\bar{n}}(x, s)$  is decreased if the algorithm chooses the Newton direction with a fixed step size; hence,  $\Phi_{\bar{n}}(x^+, s^+) \leq M_1$ , if  $\Phi_{\bar{n}}(x, s) \leq M_1$ . In

the second case, the value of  $\Phi_{\bar{n}}(\tilde{x}^+, \tilde{s}^+)$  is upper bounded by  $M_1$  independently of  $k$ . This implies the algorithm is allowed to choose any favored search direction with different step sizes in the primal and dual spaces, as long as the safeguards are ensured.

### Case 1:

It follows that

$$\begin{aligned}
& \bar{n} \log x^T s + \bar{n} \log D_{\min}^{-2} \geq \iota \bar{n} \log \bar{n}, \\
& \Rightarrow \log \{x^T s D_{\min}^{-2}\} \geq \iota \log \bar{n}, \\
& \Rightarrow \log \left\{ D_{\min}^2 \frac{\sqrt{\bar{n}}}{x^T s} \right\} \leq \log \left\{ \frac{1}{\bar{n}^{\iota-0.5}} \right\}, \\
& \Rightarrow -(\rho - \bar{n}) \log \left\{ 1 - D_{\min}^2 \frac{\sqrt{\bar{n}}}{x^T s} \right\} \leq -(\rho - \bar{n}) \log \left\{ 1 - \frac{1}{\bar{n}^{\iota-0.5}} \right\}. \tag{38}
\end{aligned}$$

Now using (32), we have,

$$\begin{aligned}
\Phi_{\bar{n}}(x^+, s^+) & \leq \Phi_{\bar{n}}(x, s) + \zeta - (\rho - \bar{n}) \log \left\{ 1 - D_{\min}^2 \frac{\sqrt{\bar{n}}}{x^T s} \right\} \\
& \leq \Phi_{\bar{n}}(x, s) + \zeta - (\rho - \bar{n}) \log \left\{ 1 - \frac{1}{\bar{n}^{\iota-0.5}} \right\} \quad (\text{using (38)}) \\
& < \Phi_{\bar{n}}(x, s). \quad (\text{using (37)})
\end{aligned}$$

### Case 2:

Using (33), we have

$$\begin{aligned}
\Phi_{\bar{n}}(\tilde{x}^+, \tilde{s}^+) & \leq \Phi_{\bar{n}}(x, s) + \zeta - (\rho - \bar{n}) \log \left\{ 1 - D_{\min}^2 \frac{\sqrt{\bar{n}}}{x^T s} \right\} + C_2 \\
& \leq \bar{n} \log x^T s - \sum_{j=1}^{\bar{n}} \log x_j s_j + \zeta - (\rho - \bar{n}) \log \left\{ 1 - D_{\min}^2 \frac{\sqrt{\bar{n}}}{x^T s} \right\} \\
& \quad + C_2 + C_3 \quad (\text{using (36)}) \\
& \leq \iota \bar{n} \log \bar{n} + \zeta - (\rho - \bar{n}) \log \left\{ 1 - D_{\min}^2 \frac{\sqrt{\bar{n}}}{x^T s} \right\} + C_2 + C_3 \\
& < \iota \bar{n} \log \bar{n} - (\rho - \bar{n}) \log \left\{ 1 - \frac{1}{\sqrt{\bar{n}}} \right\} + C_2 + C_3.
\end{aligned}$$

The result holds for

$$M_1 := \max \left\{ \iota \bar{n} \log \bar{n} - (\rho - \bar{n}) \log \left\{ 1 - \frac{1}{\sqrt{\bar{n}}} \right\} + C_2 + C_3, \Phi_{\bar{n}}(x^0, s^0) \right\}.$$

□

LEMMA 10. Let  $M_1$  be the constant given in Lemma 9. There exists a constant  $M_2$  (independent of  $k$ ) such that

$$\frac{D_{\min}^2}{(x^k)^T s^k} = \frac{\min_{j=1, \dots, \bar{n}} \{x_j^k s_j^k\}}{(x^k)^T s^k} \geq M_2,$$

where

$$M_2 = \exp \{(\bar{n} - 1) \log \{\bar{n} - 1\} - M_1\}.$$

*Proof.* We drop the index  $k$  for simplification. Using the result in Lemma 9, we have

$$M_1 \geq \Phi_{\bar{n}}(x, s) = (\bar{n}/2) \log \{(x^T s)^2 + \|r\|^2\} - \sum_{j=1}^{\bar{n}} \log x_j s_j \geq \bar{n} \log x^T s - \sum_{j=1}^{\bar{n}} \log x_j s_j.$$

Hence, it follows that

$$\begin{aligned} \log x^T s - \log x_i s_i &\leq M_1 - (\bar{n} - 1) \log x^T s + \sum_{j \neq i} \log x_j s_j \\ &\leq M_1 - (\bar{n} - 1) \log \{x^T s - x_i s_i\} + \sum_{j \neq i} \log x_j s_j \\ &\leq M_1 - (\bar{n} - 1) \log \{\bar{n} - 1\} =: -\log M_2. \end{aligned}$$

Hence, the result holds for

$$M_2 = \exp \{(\bar{n} - 1) \log \{\bar{n} - 1\} - M_1\}.$$

□

Now let

$$\begin{aligned} \sigma(x) &:= \{j \in \{1, 2, \dots, \bar{n}\} : x_j \geq s_j\} \quad \text{and} \\ \sigma(s) &:= \{j \in \{1, 2, \dots, \bar{n}\} : s_j \geq x_j\}. \end{aligned} \tag{39}$$

THEOREM 4. Assume that  $\Phi_{\rho}(x^k, s^k)$  is reduced by at least a constant amount at each iteration, and iterates are maintained while choosing search directions and step sizes satisfying Condition 1. Then, any limit point of the sequence  $\langle x^k, s^k \rangle$  is an asymptotically maximal complementary solution for HMCP.

*Proof.* Let  $(x', s')$  be a maximal complementary solution for HMCP, and let  $(x^*, s^*)$  be a limit point of the sequence  $\langle x^k, s^k \rangle$ . In the following we show that  $(x^*, s^*)$  is an asymptotically maximal complementary solution, that is,  $\sigma(x^*) = \sigma(x')$  and  $\sigma(s^*) = \sigma(s')$ .

Recall that  $r^k = s^k - F(x^k)$ . We use the notation  $|r^k|^T := (|r_1^k|, \dots, |r_n^k|)$  and let  $C_4 := \Lambda \frac{|r^0|^T x'}{(x^0)^T s^0} \geq 0$ . Using Condition 1 (i), we have

$$(r^k)^T x' \leq |r^k|^T x' \leq \Lambda ((x^k)^T s^k) \frac{|r^0|^T x'}{(x^0)^T s^0} = C_4 (x^k)^T s^k. \quad (40)$$

From the monotonicity of  $F(x)$ , we have

$$\begin{aligned} & (x^k - x')^T (F(x^k) - F(x')) \geq 0, \\ \Rightarrow & -(x^k)^T s' - (s^k - r^k)^T x' \geq 0, \quad (\text{using Theorem 1 (statement 2)}) \\ \Rightarrow & (x^k)^T s' + (s^k)^T x' \leq (r^k)^T x' \leq C_4 (x^k)^T s^k, \quad (\text{using (40)}) \\ \Rightarrow & \sum_{j \in \sigma(x')} x'_j s_j^k + \sum_{j \in \sigma(s')} s'_j x_j^k \leq C_4 (x^k)^T s^k. \end{aligned}$$

As a result, if  $j \in \sigma(x')$ , then

$$C_4 (x^k)^T s^k \geq s_j^k x'_j \geq (s_j^k x_j^k) \frac{x'_j}{x_j^k} \geq \min_{j=1, \dots, \bar{n}} \{x_j^k s_j^k\} \frac{x'_j}{x_j^k}.$$

Using Lemma 10, the above relation implies

$$x_j^k \geq \frac{\min_{j=1, \dots, \bar{n}} \{x_j^k s_j^k\}}{C_4 (x^k)^T s^k} x'_j \geq \frac{M_2}{C_4} x'_j.$$

Hence, we have  $x_j^* \geq (M_2/C_4)x'_j > 0$ , consequently  $\sigma(x^*) = \sigma(x')$ . The proof of  $\sigma(s^*) = \sigma(s')$  can be constructed in a similar way.  $\square$

REMARK 1. Note that by performing simple block elimination on the system of linear equations (9) and (10), we obtain the following alternative formulation:

$$X(\alpha \nabla F(x) d_x - \alpha \eta r) + \alpha S d_x - \alpha p = 0. \quad (41)$$

Hence,  $d_x$  is a direction obtained by applying a single Newton step to the equation

$$z(h) := X(F(x + \alpha h) - F(x) - \alpha \eta r) + \alpha S h - \alpha p = 0, \quad (42)$$

with starting point  $h = 0$ . If  $F$  is linear (for example, LP formulated as a HMCP model), then the linear system (42) can be solved exactly. In this case Theorem 2 with  $\xi = 0$  reduces to the result of Mehrotra and Huang (2012).

Suppose  $F$  is nonlinear and does not satisfy the SLC. Given positive constants  $\xi$  and  $\beta$  that satisfy conditions (27) and (28), if one can compute an approximate solution  $\delta_x$  such that

$$\|z(\delta_x)\| = \|X(F(x + \alpha\delta_x) - F(x) - \alpha\eta r) + \alpha S\delta_x - \alpha p\| \leq \xi\beta^2 \min_{j=1,\dots,\bar{n}} (x_j s_j), \quad (43)$$

then the result of Theorem 2 is still satisfied. However, finding a direction  $\delta_x$  may require many Newton steps, and an explicit bound on the number of Newton steps is unknown.

REMARK 2. Note that from Lemma 2 we have  $(x^+)^T s^+ = (1 - \alpha\eta)(x^k)^T s^k$ . As a result, if the Newton direction is chosen in the algorithm with suitable chosen parameter  $\eta = 1 - \gamma$ , then Condition 1 (i) are satisfied as the infeasibility residual and the complementarity are reduced at the same rate.

## References

- Andersen, E.D., Y. Ye. 1999. On a homogeneous algorithm for the monotone complementarity problem. *Mathematical Programming* **84** 375–399.
- Güler, O., Y. Ye. 1993. Convergence behavior of interior-point algorithms. *mathematical Programming* **60** 215–228.
- Karmarkar, N. 1984. A new polynomial-time algorithm for linear programming. *Combinatorica* **4** 373–395.
- Kojima, M., S. Mizuno, A. Yoshise. 1991. An  $O(\sqrt{n}L)$  iteration potential reduction algorithm for linear complementary problems. *Mathematical Programming* **50** 331–342.
- Mehrotra, S., K.-L. Huang. 2012. Computational experience with a modified potential reduction algorithm for linear programming. *Optimization Methods And Software* **27** 865– 891.
- Monteiro, M.D.C., I. Adler. 1990. An extension of Karmarkar type algorithm to a class of convex separable programming problems with global rate of convergence. *Mathematical of Operations Research* **15** 408–422.
- Potra, F.A., Y. Ye. 1993. A quadratically convergent polynomial algorithm for solving entropy optimization problems. *SIAM Journal on Optimization* **3** 843–860.
- Potra, F.A., Y. Ye. 1996. Interior-point methods for nonlinear complementarity problems. *Journal of Optimization Theory and Application* **88** 617–647.
- Yoshise, A. 2006. Interior point trajectories and a homogeneous model for nonlinear complementarity problems over symmetric cones. *SIAM Journal on Optimization* **17** 1129–1153.
- Zhu, J. 1992. A path following algorithm for a class of convex programming problems. *Method and Models of Operations Research* **36** 359–377.

| Problem  | Before Presolving<br>Rows | Before Presolving<br>Cols | After Presolving<br>Rows | After Presolving<br>Cols | Primal<br>Objective | Dual<br>Objective | Presolve<br>Time | Solver<br>Time | Iters | Avg<br>Diis | Prop $\Phi$<br>(%) |
|----------|---------------------------|---------------------------|--------------------------|--------------------------|---------------------|-------------------|------------------|----------------|-------|-------------|--------------------|
| aug2d    | 10000                     | 20200                     | 9604                     | 19800                    | 1.68741175E+06      | 1.68741175E+06    | 0.03             | 3.9            | 12    | 1.33        | 4.39               |
| aug2dc   | 10000                     | 20200                     | 10000                    | 20200                    | 1.81836807E+06      | 1.81836807E+06    | 0.02             | 4.07           | 12    | 1.33        | 4.48               |
| aug2dcqp | 10000                     | 20200                     | 10000                    | 20200                    | 6.49813474E+06      | 6.49813473E+06    | 0.02             | 2.4            | 13    | 2           | 6.81               |
| aug2dcqp | 10000                     | 20200                     | 10000                    | 20200                    | 6.23701204E+06      | 6.23701200E+06    | 0.01             | 2.64           | 14    | 2           | 7.5                |
| aug3d    | 1000                      | 3873                      | 512                      | 2673                     | 5.54067726E+02      | 5.54067726E+02    | 0.01             | 0.27           | 8     | 1.5         | 3.89               |
| aug3dc   | 1000                      | 3873                      | 1000                     | 3873                     | 7.71262439E+02      | 7.71262439E+02    | 0.01             | 0.38           | 8     | 1.5         | 4.38               |
| aug3dcqp | 1000                      | 3873                      | 1000                     | 3873                     | 9.93362148E+02      | 9.93362145E+02    | 0.01             | 0.36           | 11    | 2           | 4.84               |
| aug3dcqp | 1000                      | 3873                      | 1000                     | 3873                     | 6.75237672E+02      | 6.75237670E+02    | 0.01             | 0.39           | 13    | 2           | 5.59               |
| cont-050 | 2401                      | 2597                      | 2401                     | 2597                     | -4.56385090E+00     | -4.56385090E+00   | 0.01             | 0.65           | 11    | 2           | 3.49               |
| cont-100 | 9801                      | 10197                     | 9801                     | 10197                    | -4.64439787E+00     | -4.64439787E+00   | 0.01             | 4.55           | 11    | 2           | 2.11               |
| cont-101 | 10098                     | 10197                     | 10098                    | 10197                    | 1.95527325E-01      | 1.95527325E-01    | 0.01             | 4.06           | 9     | 2           | 1.95               |
| cont-200 | 39601                     | 40397                     | 39601                    | 40397                    | -4.68487592E+00     | -4.68487592E+00   | 0.04             | 43.34          | 11    | 2           | 0.99               |
| cont-201 | 40198                     | 40397                     | 40198                    | 40397                    | 1.92483373E-01      | 1.92483373E-01    | 0.04             | 42.09          | 10    | 1.9         | 1                  |
| cont-300 | 90298                     | 90597                     | 90298                    | 90597                    | 1.91512286E-01      | 1.91512286E-01    | 0.08             | 247.59         | 13    | 1.92        | 0.47               |
| cvxqp1_m | 500                       | 1000                      | 500                      | 1000                     | 1.08751157E+06      | 1.08751157E+06    | 0                | 0.41           | 10    | 2           | 2.25               |
| cvxqp1_s | 50                        | 100                       | 50                       | 100                      | 1.15907181E+04      | 1.15907181E+04    | 0                | 0.08           | 8     | 2           | 1.32               |
| cvxqp2_m | 250                       | 1000                      | 250                      | 1000                     | 8.20155431E+05      | 8.20155431E+05    | 0                | 0.23           | 10    | 2           | 2.76               |
| cvxqp2_s | 25                        | 100                       | 25                       | 100                      | 8.12094048E+03      | 8.12094048E+03    | 0                | 0.1            | 10    | 1.9         | 1.08               |
| cvxqp3_m | 750                       | 1000                      | 750                      | 1000                     | 1.36282874E+06      | 1.36282874E+06    | 0                | 0.65           | 12    | 2           | 1.41               |
| cvxqp3_s | 75                        | 100                       | 75                       | 100                      | 1.19434322E+04      | 1.19434322E+04    | 0                | 0.09           | 10    | 2           | 0                  |
| dpklo1   | 77                        | 133                       | 77                       | 133                      | 3.70096217E-01      | 3.70096217E-01    | 0                | 0.04           | 3     | 2           | 0                  |
| dtoc3    | 9998                      | 14999                     | 9997                     | 14996                    | 2.35262481E+02      | 2.35262481E+02    | 0.02             | 0.93           | 4     | 2           | 8.75               |
| dual1    | 1                         | 85                        | 1                        | 85                       | 3.50129664E-02      | 3.50129664E-02    | 0                | 0.1            | 12    | 2           | 2.06               |
| dual2    | 1                         | 96                        | 1                        | 96                       | 3.37336761E-02      | 3.37336761E-02    | 0                | 0.08           | 9     | 2           | 0                  |
| dual3    | 1                         | 111                       | 1                        | 111                      | 1.35755838E-01      | 1.35755838E-01    | 0                | 0.09           | 9     | 2           | 1.25               |
| dual4    | 1                         | 75                        | 1                        | 75                       | 7.46090842E-01      | 7.46090840E-01    | 0                | 0.08           | 10    | 2           | 1.32               |
| dualc1   | 215                       | 223                       | 13                       | 21                       | 6.15525083E+03      | 6.15525083E+03    | 0                | 0.26           | 25    | 1.48        | 0                  |
| dualc2   | 229                       | 235                       | 9                        | 15                       | 3.55130769E+03      | 3.55130769E+03    | 0                | 0.21           | 20    | 1.55        | 0                  |
| dualc5   | 278                       | 285                       | 1                        | 8                        | 4.27232327E+02      | 4.27232327E+02    | 0.01             | 0.12           | 13    | 1.62        | 0                  |
| dualc8   | 503                       | 510                       | 15                       | 22                       | 1.83093588E+04      | 1.83093588E+04    | 0.01             | 0.2            | 19    | 1.63        | 0.5                |
| genhs28  | 8                         | 10                        | 8                        | 10                       | 9.27173692E-01      | 9.27173694E-01    | 0.01             | 0.03           | 3     | 2           | 0                  |
| gouldqp2 | 349                       | 699                       | 349                      | 699                      | 1.84275300E-04      | 1.84273273E-04    | 0                | 0.16           | 13    | 2           | 3.25               |
| gouldqp3 | 349                       | 699                       | 349                      | 699                      | 2.06278397E+00      | 2.06278397E+00    | 0.01             | 0.14           | 11    | 2           | 4.58               |
| hs118    | 17                        | 32                        | 17                       | 32                       | 6.64820450E+02      | 6.64820450E+02    | 0.01             | 0.09           | 10    | 2           | 0                  |
| hs21     | 1                         | 3                         | 1                        | 3                        | -9.99599996E+01     | -9.99600001E+01   | 0.01             | 0.08           | 9     | 2           | 0                  |
| hs268    | 5                         | 10                        | 5                        | 10                       | 2.58580312E-05      | -5.06859105E-05   | 0                | 0.1            | 12    | 2           | 0                  |
| hs35     | 1                         | 4                         | 1                        | 4                        | 1.11111111E-01      | 1.11111111E-01    | 0                | 0.05           | 5     | 2           | 0                  |
| hs35mod  | 1                         | 4                         | 1                        | 3                        | 2.50000007E-01      | 2.49999989E-01    | 0                | 0.09           | 11    | 2           | 0                  |
| hs51     | 3                         | 5                         | 3                        | 5                        | 0.00000000E+00      | 9.97371075E-11    | 0.01             | 0.03           | 3     | 2           | 0                  |
| hs52     | 3                         | 5                         | 3                        | 5                        | 5.32664756E+00      | 5.32664757E+00    | 0                | 0.04           | 3     | 2           | 0                  |
| hs53     | 3                         | 5                         | 3                        | 5                        | 4.09302326E+00      | 4.09302302E+00    | 0.01             | 0.04           | 4     | 2           | 0                  |
| hs76     | 3                         | 7                         | 3                        | 7                        | -4.68181818E+00     | -4.68181818E+00   | 0                | 0.05           | 5     | 2           | 0                  |
| ksip     | 1001                      | 1021                      | 1001                     | 1021                     | 5.75797941E-01      | 5.75797941E-01    | 0.01             | 0.38           | 16    | 2           | 3.45               |

| Problem   | Before Presolving |       | After Presolving |       | Primal Objective | Dual Objective  | Presolve Time | Solver Time | Hers | Avg Dirs | Prop Φ (%) |
|-----------|-------------------|-------|------------------|-------|------------------|-----------------|---------------|-------------|------|----------|------------|
|           | Rows              | Cols  | Rows             | Cols  |                  |                 |               |             |      |          |            |
| laser     | 1000              | 2002  | 1000             | 2002  | 2.40960135E+06   | 2.40960134E+06  | 0.01          | 0.21        | 10   | 2        | 4.04       |
| liswet1   | 10000             | 20002 | 10000            | 20002 | 3.61224021E+01   | 3.61224021E+01  | 0.03          | 3.21        | 17   | 1.89     | 7.53       |
| liswet2   | 10000             | 20002 | 10000            | 20002 | 2.49980788E+01   | 2.49980759E+01  | 0.02          | 2.68        | 17   | 2        | 7.32       |
| liswet3   | 10000             | 20002 | 10000            | 20002 | 2.50012181E+01   | 2.50012181E+01  | 0.02          | 2.55        | 16   | 2        | 7.39       |
| liswet4   | 10000             | 20002 | 10000            | 20002 | 2.50001164E+01   | 2.50001107E+01  | 0.02          | 2.76        | 18   | 2        | 8.06       |
| liswet5   | 10000             | 20002 | 10000            | 20002 | 2.50343102E+01   | 2.50341783E+01  | 0.02          | 2.54        | 16   | 2        | 7.91       |
| liswet6   | 10000             | 20002 | 10000            | 20002 | 2.49957529E+01   | 2.49957445E+01  | 0.02          | 3           | 18   | 2        | 7.82       |
| liswet7   | 10000             | 20002 | 10000            | 20002 | 4.98840891E+02   | 4.98840891E+02  | 0.02          | 3.71        | 19   | 1.89     | 7.31       |
| liswet8   | 10000             | 20002 | 10000            | 20002 | 7.14470067E+02   | 7.14470059E+02  | 0.02          | 5.47        | 37   | 1.78     | 7.76       |
| liswet9   | 10000             | 20002 | 10000            | 20002 | 1.96325126E+03   | 1.96325126E+03  | 0.02          | 5.12        | 31   | 1.65     | 7.18       |
| liswet10  | 10000             | 20002 | 10000            | 20002 | 4.94858035E+01   | 4.94857840E+01  | 0.02          | 3.18        | 21   | 1.95     | 7.6        |
| liswet11  | 10000             | 20002 | 10000            | 20002 | 4.95239569E+01   | 4.95239569E+01  | 0.02          | 3.23        | 22   | 1.95     | 7.82       |
| liswet12  | 10000             | 20002 | 10000            | 20002 | 1.73692743E+03   | 1.73692743E+03  | 0.02          | 4.89        | 32   | 1.75     | 7.6        |
| lotschd   | 7                 | 12    | 7                | 12    | 2.39841590E+03   | 2.39841589E+03  | 0             | 0.05        | 9    | 2        | 0          |
| mosarqp1  | 700               | 3200  | 700              | 3200  | -9.52875441E+02  | -9.52875445E+02 | 0             | 0.21        | 9    | 2        | 5.5        |
| mosarqp2  | 600               | 1500  | 600              | 1500  | -1.59748211E+03  | -1.59748212E+03 | 0             | 0.14        | 9    | 2        | 7.35       |
| powell20  | 10000             | 20000 | 10000            | 20000 | 5.20895828E+10   | 5.20895828E+10  | 0.02          | 1.46        | 8    | 1.88     | 7.39       |
| primal1   | 85                | 410   | 85               | 410   | -3.50129646E-02  | -3.50129670E-02 | 0             | 0.11        | 9    | 2        | 2.97       |
| primal2   | 96                | 745   | 96               | 745   | -3.37336714E-02  | -3.37336763E-02 | 0             | 0.1         | 7    | 2        | 1.04       |
| primal3   | 111               | 856   | 111              | 856   | -1.35755836E-01  | -1.35755837E-01 | 0             | 0.21        | 9    | 2        | 4.71       |
| primal4   | 75                | 1564  | 75               | 1564  | -7.46090837E-01  | -7.46090843E-01 | 0             | 0.2         | 9    | 2        | 5.08       |
| primalc1  | 9                 | 239   | 9                | 239   | -6.15525083E+03  | -6.15525083E+03 | 0             | 0.14        | 18   | 1.83     | 1.49       |
| primalc2  | 7                 | 238   | 7                | 237   | -3.55130769E+03  | -3.55130769E+03 | 0             | 0.2         | 25   | 1.68     | 3.96       |
| primalc5  | 8                 | 295   | 8                | 206   | -4.27232327E+02  | -4.27232327E+02 | 0             | 0.07        | 10   | 1.9      | 1.43       |
| primalc8  | 8                 | 528   | 8                | 528   | -1.83094298E+04  | -1.83094298E+04 | 0             | 0.15        | 12   | 1.83     | 3.36       |
| q25fv47   | 820               | 1876  | 790              | 1846  | 1.37444479E+07   | 1.37444478E+07  | 0.02          | 1.55        | 27   | 2        | 4.48       |
| qadlittle | 56                | 138   | 55               | 137   | 4.80318859E+05   | 4.80318859E+05  | 0             | 0.07        | 11   | 2        | 0          |
| qafiro    | 27                | 51    | 27               | 51    | -1.59078179E+00  | -1.59078179E+00 | 0             | 0.08        | 14   | 1.86     | 0          |
| qbandm    | 305               | 472   | 252              | 419   | 1.63523420E+04   | 1.63523420E+04  | 0             | 0.17        | 20   | 2        | 0.6        |
| qbeaconf  | 173               | 295   | 107              | 219   | 1.64712060E+05   | 1.64712060E+05  | 0             | 0.1         | 14   | 2        | 1.96       |
| qbore3d   | 233               | 334   | 123              | 225   | 3.10020080E+03   | 3.10020080E+03  | 0             | 0.2         | 19   | 1.79     | 2.45       |
| qbrandy   | 220               | 303   | 136              | 246   | 2.83751149E+04   | 2.83751149E+04  | 0             | 0.13        | 17   | 2        | 0          |
| qcapri    | 271               | 482   | 243              | 438   | 6.67932932E+07   | 6.67932932E+07  | 0             | 0.37        | 36   | 1.72     | 2.72       |
| qe226     | 223               | 472   | 214              | 463   | 2.12653433E+02   | 2.12653433E+02  | 0             | 0.17        | 16   | 2        | 2.48       |
| qetamacr  | 400               | 816   | 334              | 669   | 8.67603696E+04   | 8.67603693E+04  | 0             | 0.49        | 32   | 2        | 2.29       |
| qffff80   | 524               | 1028  | 322              | 826   | 8.73147464E+05   | 8.73147456E+05  | 0             | 0.39        | 25   | 1.92     | 3.37       |
| qforplan  | 161               | 492   | 122              | 450   | 7.45663147E+09   | 7.45663144E+09  | 0             | 0.39        | 31   | 1.71     | 2.86       |
| qftrdxpn  | 616               | 1160  | 590              | 1134  | 1.00790585E+11   | 1.00790585E+11  | 0             | 0.39        | 30   | 1.9      | 3.39       |
| qgrow15   | 300               | 645   | 300              | 645   | -1.01693640E+08  | -1.01693640E+08 | 0             | 0.28        | 22   | 2        | 2.21       |
| qgrow22   | 440               | 946   | 440              | 946   | -1.49628953E+08  | -1.49628953E+08 | 0             | 0.43        | 26   | 2        | 3.77       |
| qgrow7    | 140               | 301   | 140              | 301   | -4.27987139E+07  | -4.27987139E+07 | 0             | 0.18        | 21   | 2        | 3.91       |
| qisrael   | 174               | 316   | 174              | 316   | 2.53478378E+07   | 2.53478376E+07  | 0             | 0.28        | 28   | 1.75     | 1.83       |
| qpcblend  | 74                | 114   | 74               | 114   | -7.84254164E-03  | -7.84254440E-03 | 0             | 0.11        | 17   | 2        | 1.94       |

| Problem  | Before Presolving<br>Rows | Before Presolving<br>Cols | After Presolving<br>Rows | After Presolving<br>Cols | Primal<br>Objective | Dual<br>Objective | Presolve<br>Time | Solver<br>Time | Iters | Avg<br>Dtrs | Prop $\Phi$<br>(%) |
|----------|---------------------------|---------------------------|--------------------------|--------------------------|---------------------|-------------------|------------------|----------------|-------|-------------|--------------------|
| qpcboe1  | 351                       | 726                       | 343                      | 718                      | 1.15039140E+07      | 1.15039140E+07    | 0                | 0.27           | 22    | 2           | 2.26               |
| qpcboe2  | 166                       | 305                       | 126                      | 265                      | 8.17196226E+06      | 8.17196221E+06    | 0                | 0.22           | 26    | 1.88        | 1.83               |
| qpcstair | 356                       | 614                       | 356                      | 532                      | 6.20438749E+06      | 6.20438744E+06    | 0                | 0.32           | 25    | 1.76        | 1.92               |
| qpilotno | 975                       | 2446                      | 866                      | 2151                     | 4.72858690E+06      | 4.72858690E+06    | 0.01             | 1.84           | 42    | 1.86        | 2.8                |
| qpreipe  | 91                        | 204                       | 76                       | 141                      | -2.66615999E+02     | -2.66616001E+02   | 0                | 0.12           | 19    | 2           | 0.88               |
| qptest   | 2                         | 4                         | 2                        | 4                        | 4.37187500E+00      | 4.37187500E+00    | 0                | 0.03           | 6     | 2           | 0                  |
| qsc205   | 205                       | 317                       | 203                      | 315                      | -5.81395349E-03     | -5.81395349E-03   | 0                | 0.12           | 17    | 2           | 1.69               |
| qscagr25 | 471                       | 671                       | 469                      | 669                      | 2.01737938E+08      | 2.01737938E+08    | 0                | 0.22           | 22    | 1.95        | 4.13               |
| qscagr7  | 129                       | 185                       | 127                      | 183                      | 2.68659486E+07      | 2.68659485E+07    | 0                | 0.14           | 22    | 1.82        | 2.13               |
| qscfxm1  | 330                       | 600                       | 311                      | 581                      | 1.68826916E+07      | 1.68826916E+07    | 0                | 0.29           | 25    | 2           | 2.79               |
| qscfxm2  | 660                       | 1200                      | 622                      | 1162                     | 2.77761616E+07      | 2.77761615E+07    | 0                | 0.49           | 33    | 2           | 3.56               |
| qscfxm3  | 990                       | 1800                      | 933                      | 1743                     | 3.08163545E+07      | 3.08163545E+07    | 0                | 0.73           | 35    | 1.94        | 3.37               |
| qscorpio | 388                       | 466                       | 355                      | 436                      | 1.88050955E+03      | 1.88050955E+03    | 0                | 0.15           | 14    | 1.93        | 2.8                |
| qscrs8   | 490                       | 1275                      | 445                      | 1230                     | 9.04560015E+02      | 9.04560013E+02    | 0.01             | 0.41           | 24    | 1.96        | 2.7                |
| qscsd1   | 77                        | 760                       | 77                       | 760                      | 8.66666669E+00      | 8.66666667E+00    | 0                | 0.15           | 9     | 2           | 2.05               |
| qscsd6   | 147                       | 1350                      | 147                      | 1350                     | 5.08082139E+01      | 5.08082139E+01    | 0                | 0.29           | 14    | 2           | 2.2                |
| qscsd8   | 397                       | 2750                      | 397                      | 2750                     | 9.40763578E+02      | 9.40763570E+02    | 0.01             | 0.38           | 11    | 2           | 3.76               |
| qscstap1 | 300                       | 660                       | 284                      | 644                      | 1.41586111E+03      | 1.41586111E+03    | 0.01             | 0.33           | 17    | 2           | 1.88               |
| qscstap2 | 1090                      | 2500                      | 1033                     | 2443                     | 1.73502651E+03      | 1.73502649E+03    | 0.01             | 0.51           | 13    | 2           | 2.45               |
| qscstap3 | 1480                      | 3340                      | 1408                     | 3268                     | 1.43875468E+03      | 1.43875468E+03    | 0.01             | 0.64           | 15    | 2           | 3.95               |
| qseba    | 515                       | 1036                      | 514                      | 1033                     | 8.14818004E+07      | 8.14818004E+07    | 0.01             | 0.64           | 26    | 1.92        | 1.75               |
| qshare1b | 117                       | 253                       | 112                      | 248                      | 7.20078318E+05      | 7.20078318E+05    | 0                | 0.47           | 29    | 1.76        | 1.96               |
| qshare2b | 96                        | 162                       | 96                       | 162                      | 1.17036917E+04      | 1.17036917E+04    | 0                | 0.25           | 17    | 2           | 0.41               |
| qshell   | 536                       | 1777                      | 487                      | 1475                     | 1.57263685E+12      | 1.57263684E+12    | 0.01             | 0.98           | 38    | 1.79        | 1.76               |
| qship04l | 402                       | 2166                      | 323                      | 2104                     | 2.42001553E+06      | 2.42001553E+06    | 0.01             | 0.38           | 14    | 2           | 2.93               |
| qship04s | 402                       | 1506                      | 235                      | 1356                     | 2.42499367E+06      | 2.42499367E+06    | 0.01             | 0.31           | 14    | 2           | 4.26               |
| qship08l | 778                       | 4363                      | 638                      | 4247                     | 2.37604062E+06      | 2.37604062E+06    | 0.01             | 1.12           | 14    | 2           | 4.74               |
| qship08s | 778                       | 2467                      | 366                      | 2079                     | 2.38572885E+06      | 2.38572885E+06    | 0.01             | 0.41           | 14    | 1.93        | 3.31               |
| qship12l | 1151                      | 5533                      | 784                      | 5226                     | 3.01887658E+06      | 3.01887658E+06    | 0.02             | 2.06           | 16    | 2           | 4.04               |
| qship12s | 1151                      | 2869                      | 412                      | 2190                     | 3.05696225E+06      | 3.05696225E+06    | 0.01             | 0.73           | 17    | 2           | 3.13               |
| qsierra  | 1227                      | 2735                      | 1212                     | 2705                     | 2.37504582E+07      | 2.37504582E+07    | 0                | 0.54           | 20    | 2           | 5.53               |
| qstair   | 356                       | 614                       | 356                      | 532                      | 7.98545276E+06      | 7.98545275E+06    | 0                | 0.36           | 23    | 1.87        | 2.29               |
| qstandat | 359                       | 1274                      | 346                      | 855                      | 6.41183839E+03      | 6.41183839E+03    | 0                | 0.21           | 13    | 2           | 1.96               |
| s268     | 5                         | 10                        | 5                        | 10                       | 2.58580312E-05      | -5.06859105E-05   | 0                | 0.06           | 12    | 2           | 0                  |
| stadat1  | 3999                      | 6000                      | 3999                     | 6000                     | -2.85268639E+07     | -2.85268640E+07   | 0.01             | 1.03           | 12    | 2           | 4.5                |
| stadat2  | 3999                      | 6000                      | 3999                     | 6000                     | -3.26266649E+01     | -3.26266649E+01   | 0.01             | 1.32           | 18    | 2           | 5.61               |
| stadat3  | 7999                      | 12000                     | 7999                     | 12000                    | -3.57794529E+01     | -3.57794530E+01   | 0.01             | 2.5            | 19    | 2           | 7.01               |
| tame     | 1                         | 2                         | 1                        | 2                        | 0.00000000E+00      | -4.19289224E-10   | 0                | 0.04           | 3     | 2           | 0                  |
| ubh1     | 12000                     | 18009                     | 12000                    | 17997                    | 1.11600082E+00      | 1.11600082E+00    | 0.03             | 1.19           | 3     | 2           | 10.74              |
| yao      | 2000                      | 4002                      | 2000                     | 4000                     | 1.97704256E+02      | 1.97704256E+02    | 0.01             | 1.11           | 23    | 1.57        | 4.52               |
| zezevic2 | 2                         | 4                         | 2                        | 4                        | -4.12499999E+00     | -4.12500002E+00   | 0                | 0.04           | 5     | 2           | 0                  |
| Avg      |                           |                           |                          |                          |                     |                   | 0.01             | 3.44           | 15.92 | 1.92        | 3.03               |

Table 2: iOptimize performance on Maros and Mészáros's QP test problems

| Problem     | Before Presolving |       | After Presolving |       | Primal Objective | Dual Objective  | Presolve Time | Solver Time | Iters | Avg Dirs | Prop $\Phi$ (%) |
|-------------|-------------------|-------|------------------|-------|------------------|-----------------|---------------|-------------|-------|----------|-----------------|
|             | Rows              | Cols  | Rows             | Cols  |                  |                 |               |             |       |          |                 |
| QQ-aug2d    | 10001             | 20201 | 10001            | 20201 | 1.68741182E+06   | 1.68741175E+06  | 0.01          | 3.75        | 8     | 1.75     | 4.14            |
| QQ-aug2dc   | 10001             | 20201 | 10001            | 20201 | 1.81836815E+06   | 1.81836807E+06  | 0.02          | 3.47        | 8     | 1.75     | 4.7             |
| QQ-aug2dcqp | 10001             | 20201 | 10001            | 20201 | 6.49813474E+06   | 6.49813474E+06  | 0.75          | 6.79        | 19    | 1.68     | 5.16            |
| QQ-aug2dqp  | 10001             | 20201 | 10001            | 20201 | 6.23701203E+06   | 6.23701202E+06  | 0.73          | 6.7         | 21    | 1.71     | 5.38            |
| QQ-aug3d    | 1001              | 3874  | 1001             | 3874  | 5.54067753E+02   | 5.54067816E+02  | 0.01          | 0.56        | 5     | 2        | 2.03            |
| QQ-aug3dc   | 1001              | 3874  | 1001             | 3874  | 7.71262488E+02   | 7.71262604E+02  | 0.01          | 0.21        | 5     | 2        | 6.38            |
| QQ-aug3dcqp | 1001              | 3874  | 1001             | 3874  | 9.93362146E+02   | 9.93362144E+02  | 0.04          | 0.44        | 11    | 2        | 5.74            |
| QQ-aug3dqp  | 1001              | 3874  | 1001             | 3874  | 6.75237669E+02   | 6.75237664E+02  | 0.03          | 0.43        | 12    | 2        | 6.31            |
| QQ-cont-050 | 2402              | 2598  | 2402             | 2598  | -4.56385143E+00  | -4.56385137E+00 | 0.01          | 0.75        | 11    | 2        | 3.51            |
| QQ-cont-100 | 9802              | 10198 | 9802             | 10198 | -4.64439991E+00  | -4.64439983E+00 | 0.01          | 5.59        | 12    | 2        | 2.2             |
| QQ-cont-101 | 10099             | 10198 | 10099            | 10198 | 1.95527204E-01   | 1.95527225E-01  | 0.01          | 5.21        | 11    | 2        | 1.97            |
| QQ-cont-200 | 39602             | 40398 | 39602            | 40398 | -4.68487611E+00  | -4.68487609E+00 | 0.05          | 49.43       | 13    | 2        | 1.32            |
| QQ-cont-201 | 40199             | 40398 | 40199            | 40398 | 1.92483103E-01   | 1.92483155E-01  | 0.04          | 57.03       | 12    | 2        | 0.84            |
| QQ-cont-300 | 90299             | 90598 | 90299            | 90598 | 1.91512063E-01   | 1.91512092E-01  | 0.1           | 261.3       | 12    | 2        | 0.43            |
| QQ-cvxqp1-m | 501               | 1001  | 501              | 1001  | 1.08751109E+06   | 1.08751098E+06  | 0.01          | 0.38        | 10    | 2        | 2.16            |
| QQ-cvxqp1-s | 51                | 101   | 51               | 101   | 1.15907177E+04   | 1.15907177E+04  | 0             | 0.05        | 8     | 2        | 4.17            |
| QQ-cvxqp2-m | 251               | 1001  | 251              | 1001  | 8.20155390E+05   | 8.20155375E+05  | 0             | 0.22        | 10    | 2        | 2.86            |
| QQ-cvxqp2-s | 26                | 101   | 26               | 101   | 8.12093991E+03   | 8.12093970E+03  | 0             | 0.05        | 9     | 2        | 0               |
| QQ-cvxqp3-m | 751               | 1001  | 751              | 1001  | 1.36282857E+06   | 1.36282854E+06  | 0.01          | 0.78        | 13    | 2        | 1.57            |
| QQ-cvxqp3-s | 76                | 101   | 76               | 101   | 1.19434322E+04   | 1.19434317E+04  | 0             | 0.06        | 9     | 2        | 0               |
| QQ-dpklol   | 78                | 134   | 78               | 134   | 3.70096112E-01   | 3.70096109E-01  | 0             | 0.04        | 5     | 2        | 0               |
| QQ-dtoc3    | 9999              | 15000 | 9999             | 14998 | 2.35262505E+02   | 2.35262481E+02  | 0.31          | 2.22        | 7     | 1.71     | 5.97            |
| QQ-dual1    | 2                 | 86    | 2                | 86    | 3.50125784E-02   | 3.50123964E-02  | 0             | 0.07        | 13    | 2        | 1.47            |
| QQ-dual2    | 2                 | 97    | 2                | 97    | 3.373345240E-02  | 3.37334725E-02  | 0             | 0.07        | 12    | 2        | 1.45            |
| QQ-dual3    | 2                 | 112   | 2                | 112   | 1.35755782E-01   | 1.35755743E-01  | 0             | 0.08        | 12    | 2        | 1.35            |
| QQ-dual4    | 2                 | 76    | 2                | 76    | 7.46090320E-01   | 7.46089988E-01  | 0             | 0.06        | 10    | 2        | 1.92            |
| QQ-dualc1   | 216               | 224   | 216              | 224   | 6.15524425E+03   | 6.15524190E+03  | 0             | 0.14        | 21    | 2        | 3.62            |
| QQ-dualc2   | 230               | 236   | 230              | 236   | 3.55130765E+03   | 3.55130761E+03  | 0             | 0.12        | 17    | 2        | 2.68            |
| QQ-dualc5   | 279               | 286   | 279              | 286   | 4.27232103E+02   | 4.27231914E+02  | 0             | 0.07        | 9     | 2        | 4.76            |
| QQ-dualc8   | 504               | 511   | 504              | 511   | 1.83093532E+04   | 1.83093473E+04  | 0             | 0.13        | 13    | 2        | 6.56            |
| QQ-gehs28   | 9                 | 11    | 9                | 11    | 9.27173702E-01   | 9.27173694E-01  | 0             | 0.03        | 5     | 2        | 0               |
| QQ-gouldqp2 | 350               | 700   | 350              | 700   | 1.84274493E-04   | 1.84273733E-04  | 0             | 0.15        | 15    | 2        | 4.76            |
| QQ-gouldqp3 | 350               | 700   | 350              | 700   | 2.062783287E+00  | 2.06278325E+00  | 0             | 0.12        | 10    | 2        | 4.24            |
| QQ-hs118    | 18                | 33    | 18               | 33    | 6.64820445E+02   | 6.64820439E+02  | 0             | 0.05        | 11    | 2        | 0               |
| QQ-hs21     | 2                 | 4     | 2                | 4     | -9.99600032E+01  | -9.99600019E+01 | 0             | 0.05        | 10    | 2        | 0               |
| QQ-hs268    | 6                 | 11    | 6                | 11    | -2.12146135E-07  | -7.69541657E-07 | 0             | 0.07        | 15    | 2        | 0               |
| QQ-hs35     | 2                 | 5     | 2                | 5     | 1.11111110E-01   | 1.11111107E-01  | 0             | 0.03        | 6     | 2        | 0               |
| QQ-hs35mod  | 2                 | 5     | 2                | 5     | 2.49999954E-01   | 2.49999959E-01  | 0             | 0.06        | 12    | 2        | 0               |
| QQ-hs51     | 4                 | 6     | 4                | 6     | 4.24138339E-08   | 3.60237236E-08  | 0             | 0.02        | 5     | 2        | 4.76            |
| QQ-hs52     | 4                 | 6     | 4                | 6     | 5.32664757E+00   | 5.32664757E+00  | 0             | 0.02        | 5     | 2        | 0               |
| QQ-hs53     | 4                 | 6     | 4                | 6     | 4.09302193E+00   | 4.09302286E+00  | 0             | 0.03        | 6     | 2        | 0               |
| QQ-hs76     | 4                 | 8     | 4                | 8     | -4.68181818E+00  | -4.68181818E+00 | 0             | 0.03        | 6     | 2        | 0               |
| QQ-ksip     | 1002              | 1022  | 1002             | 1022  | 5.75797941E-01   | 5.75797940E-01  | 0.01          | 0.29        | 13    | 2        | 3.42            |

| Problem      | Before Presolving<br>Rows | Before Presolving<br>Cols | After Presolving<br>Rows | After Presolving<br>Cols | Primal<br>Objective | Dual<br>Objective | Presolve<br>Time | Solver<br>Time | Iters | Avg<br>Dirs | Prop $\Phi$<br>(%) |
|--------------|---------------------------|---------------------------|--------------------------|--------------------------|---------------------|-------------------|------------------|----------------|-------|-------------|--------------------|
| QQ-laser     | 1001                      | 2003                      | 1001                     | 2003                     | 2.40960146E+06      | 2.40960145E+06    | 0                | 0.6            | 19    | 1.53        | 4.79               |
| QQ-liswet1   | 10001                     | 20003                     | 10001                    | 20003                    | 3.61224031E+01      | 3.61224021E+01    | 0.02             | 4.87           | 21    | 1.95        | 5.63               |
| QQ-liswet2   | 10001                     | 20003                     | 10001                    | 20003                    | 2.49980889E+01      | 2.49980663E+01    | 0.02             | 4.23           | 17    | 2           | 5.29               |
| QQ-liswet3   | 10001                     | 20003                     | 10001                    | 20003                    | 2.50012248E+01      | 2.50012132E+01    | 0.02             | 3.94           | 17    | 2           | 6.13               |
| QQ-liswet4   | 10001                     | 20003                     | 10001                    | 20003                    | 2.50001177E+01      | 2.50001054E+01    | 0.02             | 4.26           | 18    | 2           | 5.67               |
| QQ-liswet5   | 10001                     | 20003                     | 10001                    | 20003                    | 2.50342522E+01      | 2.50342269E+01    | 0.02             | 4.44           | 20    | 2           | 5.95               |
| QQ-liswet6   | 10001                     | 20003                     | 10001                    | 20003                    | 2.49957486E+01      | 2.49957422E+01    | 0.02             | 4.22           | 19    | 2           | 6.16               |
| QQ-liswet7   | 10001                     | 20003                     | 10001                    | 20003                    | 4.98841004E+02      | 4.98840891E+02    | 0.02             | 5.85           | 22    | 1.73        | 5.4                |
| QQ-liswet8   | 10001                     | 20003                     | 10001                    | 20003                    | 7.14470246E+02      | 7.14470012E+02    | 0.02             | 7.68           | 30    | 1.7         | 5.48               |
| QQ-liswet9   | 10001                     | 20003                     | 10001                    | 20003                    | 1.96325241E+03      | 1.96325122E+03    | 0.02             | 10.43          | 36    | 1.67        | 5                  |
| QQ-liswet10  | 10001                     | 20003                     | 10001                    | 20003                    | 4.94858015E+01      | 4.94857829E+01    | 0.02             | 6.31           | 29    | 2           | 5.84               |
| QQ-liswet11  | 10001                     | 20003                     | 10001                    | 20003                    | 4.95239698E+01      | 4.95239560E+01    | 0.02             | 5.3            | 23    | 1.96        | 6.63               |
| QQ-liswet12  | 10001                     | 20003                     | 10001                    | 20003                    | 1.73692791E+03      | 1.73692742E+03    | 0.02             | 9.62           | 38    | 1.68        | 5.43               |
| QQ-lotschd   | 8                         | 13                        | 8                        | 13                       | 2.39841591E+03      | 2.39841578E+03    | 0                | 0.03           | 9     | 2           | 0                  |
| QQ-mosarqp1  | 701                       | 3201                      | 701                      | 3201                     | -9.52875445E+02     | -9.52875470E+02   | 0                | 0.27           | 10    | 2           | 6.3                |
| QQ-mosarqp2  | 601                       | 1501                      | 601                      | 1501                     | -1.59748212E+03     | -1.59748217E+03   | 0                | 0.15           | 9     | 2           | 5.56               |
| QQ-powell20  | 10001                     | 20001                     | 10001                    | 20001                    | 5.20895810E+10      | 5.20895828E+10    | 0.02             | 7.8            | 19    | 1.37        | 3.72               |
| QQ-primal1   | 86                        | 411                       | 86                       | 411                      | -3.50129655E-02     | -3.50129677E-02   | 0                | 0.1            | 10    | 2           | 1.04               |
| QQ-primal2   | 97                        | 746                       | 97                       | 746                      | -3.37336759E-02     | -3.37336761E-02   | 0                | 0.13           | 9     | 2           | 3.42               |
| QQ-primal3   | 112                       | 857                       | 112                      | 857                      | -1.35755836E-01     | -1.35755837E-01   | 0                | 0.26           | 11    | 2           | 4.96               |
| QQ-primal4   | 76                        | 1565                      | 76                       | 1565                     | -7.46090838E-01     | -7.46090843E-01   | 0                | 0.22           | 9     | 2           | 4.46               |
| QQ-primalc1  | 10                        | 240                       | 10                       | 240                      | -6.15525075E+03     | -6.15525083E+03   | 0                | 0.11           | 19    | 2           | 0.97               |
| QQ-primalc2  | 8                         | 239                       | 8                        | 239                      | -3.55130754E+03     | -3.55130761E+03   | 0                | 0.09           | 17    | 2           | 0                  |
| QQ-primalc5  | 9                         | 296                       | 9                        | 296                      | -4.27232136E+02     | -4.27232268E+02   | 0                | 0.07           | 10    | 2           | 3.13               |
| QQ-primalc8  | 9                         | 529                       | 9                        | 529                      | -1.83094193E+04     | -1.83094258E+04   | 0                | 0.11           | 12    | 2           | 1.83               |
| QQ-q25fv47   | 821                       | 1877                      | 800                      | 1856                     | 1.37444358E+07      | 1.37444267E+07    | 0.02             | 1.74           | 28    | 1.93        | 3.16               |
| QQ-qadlittle | 57                        | 139                       | 56                       | 138                      | 4.80318851E+05      | 4.80318850E+05    | 0                | 0.05           | 12    | 2           | 0                  |
| QQ-qafiro    | 28                        | 52                        | 28                       | 52                       | -1.59078178E+00     | -1.59078188E+00   | 0                | 0.04           | 14    | 2           | 4.65               |
| QQ-qbandm    | 306                       | 473                       | 278                      | 445                      | 1.63523409E+04      | 1.63523397E+04    | 0                | 0.18           | 21    | 2           | 2.27               |
| QQ-qbeaconf  | 174                       | 296                       | 141                      | 257                      | 1.64711933E+05      | 1.6471173E+05     | 0                | 0.09           | 13    | 2           | 3.53               |
| QQ-qbore3d   | 234                       | 335                       | 200                      | 303                      | 3.10020162E+03      | 3.10020194E+03    | 0                | 0.18           | 19    | 2           | 3.39               |
| QQ-qbrandy   | 221                       | 304                       | 141                      | 251                      | 2.83751074E+04      | 2.83751029E+04    | 0                | 0.16           | 17    | 2           | 2.61               |
| QQ-qcapri    | 272                       | 483                       | 262                      | 457                      | 6.67932279E+07      | 6.67932452E+07    | 0.01             | 0.3            | 32    | 1.69        | 3.36               |
| QQ-qe226     | 224                       | 473                       | 223                      | 472                      | 2.12653431E+02      | 2.12653417E+02    | 0                | 0.15           | 17    | 2           | 1.39               |
| QQ-qetamacr  | 401                       | 817                       | 401                      | 814                      | 8.67601160E+04      | 8.67601476E+04    | 0                | 0.59           | 33    | 2           | 3.97               |
| QQ-qffiff80  | 525                       | 1029                      | 491                      | 995                      | 8.73147438E+05      | 8.73146951E+05    | 0                | 0.49           | 26    | 2           | 4.02               |
| QQ-qforplan  | 162                       | 493                       | 136                      | 467                      | 7.456661267E+09     | 7.456660721E+09   | 0.01             | 0.27           | 23    | 2           | 3.04               |
| QQ-qgfrdxpn  | 617                       | 1161                      | 591                      | 1135                     | 1.00790508E+11      | 1.00790507E+11    | 0.01             | 0.3            | 24    | 2           | 4.36               |
| QQ-qgrow15   | 301                       | 646                       | 301                      | 646                      | -1.01693609E+08     | -1.01693652E+08   | 0                | 0.26           | 21    | 2           | 2.76               |
| QQ-qgrow22   | 441                       | 947                       | 441                      | 947                      | -1.49628886E+08     | -1.49628968E+08   | 0                | 0.41           | 24    | 2           | 3.28               |
| QQ-qgrow7    | 141                       | 302                       | 141                      | 302                      | -4.27987148E+07     | -4.27987170E+07   | 0                | 0.15           | 21    | 2           | 4.7                |
| QQ-qisrael   | 175                       | 317                       | 175                      | 317                      | 2.53478001E+07      | 2.53477766E+07    | 0                | 0.28           | 29    | 1.83        | 2.89               |
| QQ-qpcblend  | 75                        | 115                       | 75                       | 115                      | -7.84259484E-03     | -7.84259090E-03   | 0                | 0.08           | 16    | 2           | 5.41               |

| Problem     | Before Presolving |       | After Presolving |       | Primal          |                 | Dual      |           | Presolve Time | Solver Time | Iters | Avg Divs | Prop $\Phi$ (%) |
|-------------|-------------------|-------|------------------|-------|-----------------|-----------------|-----------|-----------|---------------|-------------|-------|----------|-----------------|
|             | Rows              | Cols  | Rows             | Cols  | Objective       | Objective       | Objective | Objective |               |             |       |          |                 |
| QQ-qpboe1   | 352               | 727   | 349              | 724   | 1.15039007E+07  | 1.15039019E+07  | 0.01      | 0.34      | 24            | 1.96        | 5.18  |          |                 |
| QQ-qpboe2   | 167               | 306   | 141              | 280   | 8.17195892E+06  | 8.17195821E+06  | 0         | 0.25      | 29            | 1.97        | 4.18  |          |                 |
| QQ-qpboe3   | 357               | 615   | 357              | 615   | 6.20438137E+06  | 6.20437660E+06  | 0.01      | 0.31      | 21            | 2           | 3.99  |          |                 |
| QQ-qpilotno | 976               | 2447  | 955              | 2248  | 4.72823223E+06  | 4.72827122E+06  | 0.04      | 1.23      | 30            | 2           | 3.07  |          |                 |
| QQ-qrecipe  | 92                | 205   | 84               | 149   | -2.66616053E+02 | -2.66616081E+02 | 0         | 0.09      | 18            | 2           | 2.27  |          |                 |
| QQ-qpctest  | 3                 | 5     | 3                | 5     | 4.37187497E+03  | 4.37187483E+03  | 0         | 0.02      | 7             | 2           | 0     |          |                 |
| QQ-qsc205   | 206               | 318   | 204              | 316   | -5.81401694E-03 | -5.81421806E-03 | 0         | 0.1       | 17            | 2           | 2.13  |          |                 |
| QQ-qscagr25 | 472               | 672   | 472              | 672   | 2.01737737E+08  | 2.01737657E+08  | 0         | 0.36      | 29            | 1.66        | 3.13  |          |                 |
| QQ-qscagr7  | 130               | 186   | 129              | 185   | 2.68659112E+07  | 2.68658869E+07  | 0         | 0.09      | 19            | 2           | 3.33  |          |                 |
| QQ-qscfxm1  | 331               | 601   | 323              | 593   | 1.68826874E+07  | 1.68826848E+07  | 0         | 0.35      | 30            | 1.77        | 3.8   |          |                 |
| QQ-qscfxm2  | 661               | 1201  | 646              | 1186  | 2.77761554E+07  | 2.77761498E+07  | 0         | 0.69      | 36            | 1.81        | 4.15  |          |                 |
| QQ-qscfxm3  | 991               | 1801  | 969              | 1779  | 3.08163509E+07  | 3.08163491E+07  | 0         | 0.97      | 37            | 1.84        | 4.3   |          |                 |
| QQ-qscfxpmo | 389               | 467   | 373              | 456   | 1.88050938E+03  | 1.88050937E+03  | 0         | 0.16      | 16            | 2           | 2.65  |          |                 |
| QQ-qscsc8   | 491               | 1276  | 491              | 1276  | 9.04559788E+02  | 9.04559689E+02  | 0         | 0.38      | 24            | 2           | 2.96  |          |                 |
| QQ-qscscd1  | 78                | 761   | 78               | 761   | 8.66666691E+00  | 8.66666672E+00  | 0         | 0.12      | 11            | 2           | 3.6   |          |                 |
| QQ-qscscd6  | 148               | 1351  | 148              | 1351  | 5.08082149E+01  | 5.08082137E+01  | 0         | 0.2       | 15            | 2           | 6.91  |          |                 |
| QQ-qscscd8  | 398               | 2751  | 398              | 2751  | 9.40763587E+02  | 9.40763560E+02  | 0         | 0.33      | 12            | 2           | 4.03  |          |                 |
| QQ-qscscap1 | 301               | 661   | 301              | 661   | 1.41586111E+03  | 1.41586111E+03  | 0         | 0.19      | 20            | 2           | 3.17  |          |                 |
| QQ-qscscap2 | 1091              | 2501  | 1091             | 2501  | 1.73502650E+03  | 1.73502649E+03  | 0         | 0.38      | 13            | 2           | 4.79  |          |                 |
| QQ-qscscap3 | 1481              | 3341  | 1481             | 3341  | 1.43875468E+03  | 1.43875468E+03  | 0         | 0.52      | 14            | 2           | 4.59  |          |                 |
| QQ-qscscapb | 516               | 1037  | 516              | 1037  | 8.14817931E+07  | 8.14817942E+07  | 0.02      | 0.43      | 28            | 1.86        | 4.47  |          |                 |
| QQ-qshare1b | 118               | 254   | 113              | 249   | 7.20078322E+05  | 7.20078214E+05  | 0         | 0.15      | 26            | 2           | 1.4   |          |                 |
| QQ-qshare2b | 97                | 163   | 97               | 163   | 1.17036812E+04  | 1.17036812E+04  | 0         | 0.09      | 19            | 2           | 1.15  |          |                 |
| QQ-qshell   | 537               | 1778  | 537              | 1775  | 1.57263633E+12  | 1.57263551E+12  | 0.02      | 1.01      | 30            | 2           | 4.25  |          |                 |
| QQ-qship041 | 403               | 2167  | 357              | 2163  | 2.42001501E+06  | 2.42001490E+06  | 0         | 0.32      | 15            | 2           | 3.27  |          |                 |
| QQ-qship04s | 403               | 1507  | 269              | 1415  | 2.42499308E+06  | 2.42499280E+06  | 0         | 0.22      | 14            | 2           | 2.9   |          |                 |
| QQ-qship081 | 779               | 4364  | 695              | 4346  | 2.37604021E+06  | 2.37604015E+06  | 0.02      | 1.53      | 15            | 2           | 3.9   |          |                 |
| QQ-qship08s | 779               | 2468  | 487              | 2242  | 2.38572832E+06  | 2.38572819E+06  | 0.01      | 0.59      | 15            | 2           | 5.05  |          |                 |
| QQ-qship121 | 1152              | 5534  | 921              | 5412  | 3.01887662E+06  | 3.01887624E+06  | 0.03      | 3.32      | 19            | 2           | 2.88  |          |                 |
| QQ-qship12s | 1152              | 2870  | 688              | 2515  | 3.05696198E+06  | 3.05696007E+06  | 0.01      | 0.84      | 19            | 2           | 4.73  |          |                 |
| QQ-qstair   | 1228              | 2736  | 1228             | 2721  | 2.37504456E+07  | 2.37504474E+07  | 0         | 0.64      | 20            | 2           | 5.06  |          |                 |
| QQ-qstair   | 357               | 615   | 357              | 546   | 7.98544934E+06  | 7.98544810E+06  | 0.01      | 0.33      | 24            | 1.92        | 2.51  |          |                 |
| QQ-qstandat | 360               | 1275  | 359              | 1192  | 6.41183858E+03  | 6.41183826E+03  | 0.01      | 0.29      | 17            | 2           | 4.2   |          |                 |
| QQ-s268     | 6                 | 11    | 6                | 11    | -2.12146135E-07 | -7.69541657E-07 | 0         | 0.04      | 15            | 2           | 0     |          |                 |
| QQ-stadat1  | 4000              | 6001  | 4000             | 6001  | -2.85268640E+07 | -2.85268640E+07 | 0.01      | 1.7       | 19            | 1.53        | 5.02  |          |                 |
| QQ-stadat2  | 4000              | 6001  | 4000             | 6001  | -3.26266629E+01 | -3.26266666E+01 | 0.01      | 1.01      | 18            | 2           | 7.01  |          |                 |
| QQ-stadat3  | 8000              | 12001 | 8000             | 12001 | -3.57794533E+01 | -3.57794533E+01 | 0.01      | 2.18      | 18            | 2           | 6.65  |          |                 |
| QQ-tame     | 2                 | 3     | 2                | 3     | -3.27685749E-10 | -6.53153282E-10 | 0         | 0.02      | 6             | 2           | 0     |          |                 |
| QQ-ubh1     | 12001             | 18010 | 12001            | 17998 | 1.11600080E+00  | 1.11600080E+00  | 0.47      | 1.46      | 5             | 2           | 11.09 |          |                 |
| QQ-yao      | 2001              | 4003  | 2001             | 4003  | 1.97704256E+02  | 1.97704256E+02  | 0.02      | 1.01      | 23            | 1.87        | 5.14  |          |                 |
| QQ-zecevic2 | 3                 | 5     | 3                | 5     | -4.12500000E+00 | -4.12500003E+00 | 0         | 0.02      | 7             | 2           | 0     |          |                 |
| Avg         |                   |       |                  |       |                 |                 | 0.03      | 4.08      | 16.49         | 1.95        | 3.37  |          |                 |

Table 3: iOptimize performance on Mittelmann's QCQP test problems

| Problem  | Before Presolving |      | After Presolving |      | Primal Objective |                 | Dual Objective |      | Presolve Time | Solver Time | Iters | Avg Dirs | Prop $\Phi$ (%) |
|----------|-------------------|------|------------------|------|------------------|-----------------|----------------|------|---------------|-------------|-------|----------|-----------------|
|          | Rows              | Cols | Rows             | Cols | Objective        | Objective       | Time           | Time |               |             |       |          |                 |
| airport  | 42                | 84   | 42               | 84   | 4.79527017E+04   | 4.79526915E+04  | 0              | 0    | 0.17          | 28          | 1.29  | 1.86     |                 |
| polak4   | 3                 | 3    | 3                | 3    | 2.43646932E-08   | 1.65838221E-07  | 0              | 0    | 0.04          | 13          | 2     | 0        |                 |
| makela1  | 2                 | 4    | 2                | 4    | -1.41421356E+00  | -1.41421356E+00 | 0              | 0    | 0.03          | 8           | 2     | 4.35     |                 |
| makela2  | 3                 | 3    | 3                | 3    | 7.20000270E+00   | 7.20000353E+00  | 0              | 0    | 0.02          | 7           | 2     | 5.26     |                 |
| makela3  | 20                | 21   | 20               | 21   | 2.31888348E-11   | 0.00000000E+00  | 0              | 0    | 0.03          | 8           | 2     | 0        |                 |
| gigomez1 | 3                 | 5    | 3                | 5    | -2.99999998E+00  | -2.99999992E+00 | 0              | 0    | 0.03          | 9           | 1.67  | 0        |                 |
| hanging  | 180               | 288  | 180              | 288  | -6.20176047E+02  | -6.20176047E+02 | 0              | 0    | 0.16          | 10          | 2     | 3.45     |                 |
| madsschj | 158               | 81   | 158              | 81   | -7.97283702E+02  | -7.97283702E+02 | 0              | 0    | 0.14          | 11          | 1.64  | 2.27     |                 |
| rosemnx  | 4                 | 5    | 4                | 5    | -4.39999956E+01  | -4.39999945E+01 | 0              | 0    | 0.03          | 8           | 2     | 0        |                 |
| optward  | 2                 | 8    | 2                | 8    | -1.09999913E+00  | -1.09999913E+00 | 0              | 0    | 0.03          | 10          | 2     | 0        |                 |
| optprloc | 30                | 35   | 30               | 35   | -1.64197690E+01  | -1.64197857E+01 | 0              | 0    | 0.06          | 16          | 1.81  | 0        |                 |
| Avg      |                   |      |                  |      |                  |                 | 0.00           | 0.07 | 11.64         | 1.86        | 1.56  |          |                 |

Table 4: iOptimize performance on Cute QCQP test problems

| Problem                | Before Presolving<br>Rows | After Presolving<br>Cols | Primal<br>Objective | Dual<br>Objective | Presolve<br>Time | Solver<br>Time  | Iters | Avg<br>Dns | Prop $\Phi$<br>(%) |      |       |
|------------------------|---------------------------|--------------------------|---------------------|-------------------|------------------|-----------------|-------|------------|--------------------|------|-------|
| bigbank                | 814                       | 1773                     | 814                 | 1773              | -4.20569613E+06  | -4.20566623E+06 | 0.01  | 5.89       | 21                 | 1.67 | 6.53  |
| gridnet6               | 3844                      | 7565                     | 3844                | 7565              | 2.06554692E+02   | 2.06554667E+02  | 0.02  | 2.76       | 7                  | 2    | 8.87  |
| gridnetf               | 3844                      | 7565                     | 3844                | 7565              | 2.42109044E+02   | 2.421089909E+02 | 0.02  | 24.67      | 13                 | 2    | 8.05  |
| gridmeth               | 36                        | 61                       | 36                  | 61                | 3.96262686E+01   | 3.96262678E+01  | 0     | 0.09       | 6                  | 2    | 1.16  |
| gridneti               | 36                        | 61                       | 36                  | 61                | 4.02474662E+01   | 4.02474593E+01  | 0.01  | 0.08       | 8                  | 2    | 0     |
| dallas1                | 598                       | 837                      | 598                 | 837               | -2.02604132E+05  | -2.02605958E+05 | 0     | 1.93       | 33                 | 1.7  | 6.72  |
| dallas2                | 119                       | 164                      | 119                 | 164               | -4.81981888E+04  | -4.82005984E+04 | 0.01  | 0.59       | 31                 | 1.68 | 2.41  |
| dallas3                | 29                        | 44                       | 29                  | 44                | -3.23932257E+04  | -3.23932491E+04 | 0.01  | 0.49       | 31                 | 1.65 | 1.44  |
| polak1                 | 2                         | 3                        | 2                   | 3                 | 2.71828183E+00   | 2.71828183E+00  | 0.01  | 0.04       | 5                  | 2    | 0     |
| polak2                 | 2                         | 11                       | 2                   | 11                | 5.45981500E+01   | 5.45981501E+01  | 0     | 0.04       | 5                  | 2    | 2.7   |
| polak3                 | 10                        | 12                       | 10                  | 12                | 5.93300334E+00   | 5.93300332E+00  | 0     | 0.09       | 8                  | 2    | 2.35  |
| polak5                 | 2                         | 3                        | 2                   | 3                 | 4.99999999E+01   | 5.00000001E+01  | 0     | 0.05       | 5                  | 2    | 4.55  |
| smbank                 | 64                        | 117                      | 64                  | 117               | -7.12929192E+06  | -7.12929437E+06 | 0     | 0.49       | 27                 | 1.3  | 1.86  |
| cantlivr               | 1                         | 5                        | 1                   | 5                 | 1.33995627E+00   | 1.33995688E+00  | 0     | 0.16       | 12                 | 2    | 0.65  |
| cb2                    | 3                         | 3                        | 3                   | 3                 | 1.95222449E+00   | 1.95222448E+00  | 0     | 0.08       | 8                  | 2    | 0     |
| cb3                    | 3                         | 3                        | 3                   | 3                 | 2.00000001E+00   | 2.00000001E+00  | 0.01  | 0.07       | 7                  | 2    | 0     |
| chacomm1               | 3                         | 3                        | 3                   | 3                 | 1.95222449E+00   | 1.95222448E+00  | 0     | 0.08       | 8                  | 2    | 0     |
| chacomm2               | 3                         | 3                        | 3                   | 3                 | 2.00000001E+00   | 2.00000001E+00  | 0     | 0.07       | 7                  | 2    | 0     |
| dipigri                | 4                         | 7                        | 4                   | 7                 | 6.80630123E+02   | 6.80629688E+02  | 0     | 0.1        | 10                 | 2    | 0     |
| gpp                    | 498                       | 499                      | 498                 | 499               | 1.44009283E+04   | 1.44009270E+04  | 0.03  | 2.3        | 10                 | 2    | 7.93  |
| hong                   | 1                         | 4                        | 1                   | 4                 | 1.34730668E+00   | 1.34730660E+00  | 0     | 0.15       | 15                 | 2    | 0     |
| loadbal                | 31                        | 51                       | 31                  | 51                | 4.52851049E-01   | 4.52850913E-01  | 0     | 0.19       | 21                 | 1.9  | 0.53  |
| svanberg               | 5000                      | 5000                     | 5000                | 5000              | 8.36142276E+03   | 8.36142275E+03  | 0.1   | 99.69      | 14                 | 2    | 11.59 |
| antenna\antenna2       | 166                       | 49                       | 166                 | 49                | 1.57986028E+00   | 1.57986028E+00  | 0.01  | 8.62       | 16                 | 1.94 | 8.09  |
| antenna\antenna_vareps | 166                       | 50                       | 166                 | 50                | 1.22309383E+00   | 1.22309383E+00  | 0.01  | 11.65      | 18                 | 1.78 | 7.19  |
| braess\trafequill      | 361                       | 722                      | 361                 | 722               | 5.26883710E+01   | 5.2688376E+01   | 0.01  | 1.06       | 16                 | 2    | 1.1   |
| braess\trafequill2     | 437                       | 798                      | 437                 | 798               | 5.26883638E+01   | 5.26883618E+01  | 0     | 1.66       | 13                 | 2    | 7.98  |
| braess\trafequillf     | 309                       | 856                      | 309                 | 856               | 5.15910514E+01   | 5.15910257E+01  | 0     | 1.62       | 15                 | 2    | 0.66  |
| braess\trafequill2sf   | 385                       | 932                      | 385                 | 932               | 5.15910455E+01   | 5.15910368E+01  | 0.01  | 2.1        | 12                 | 2    | 7.69  |
| elena\chemeq           | 12                        | 38                       | 12                  | 38                | -1.91087044E+03  | -1.91087044E+03 | 0.01  | 0.28       | 20                 | 1.5  | 0.73  |
| elena\s383             | 1                         | 14                       | 1                   | 14                | 7.28593654E+05   | 7.28593512E+05  | 0     | 0.24       | 21                 | 1.33 | 0.85  |
| firfilter\fir-convex   | 243                       | 163                      | 243                 | 163               | 1.04648765E+00   | 1.04648766E+00  | 0     | 0.65       | 13                 | 2    | 7.41  |
| markowitz\growthopt    | 1                         | 8                        | 1                   | 8                 | -1.17084820E-01  | -1.17084818E-01 | 0     | 0.06       | 7                  | 2    | 0     |
| wbv\antenna2           | 1197                      | 1180                     | 1197                | 1180              | 1.09359976E+00   | 1.09359979E+00  | 0     | 80.82      | 13                 | 2    | 9.25  |
| wbv\lowpass2           | 200                       | 219                      | 200                 | 219               | 1.05908595E+00   | 1.05908552E+00  | 0     | 7.42       | 22                 | 2    | 6.96  |
| batch                  | 73                        | 106                      | 73                  | 106               | 2.59180316E+05   | 2.59134654E+05  | 0     | 0.11       | 12                 | 2    | 0.97  |
| stockcycle             | 97                        | 481                      | 97                  | 481               | 1.17916252E+05   | 1.17915998E+05  | 0     | 0.17       | 10                 | 2    | 3.66  |
| synthes1               | 6                         | 10                       | 6                   | 10                | 7.59284810E-01   | 7.59283839E-01  | 0     | 0.04       | 6                  | 2    | 0     |
| synthes2               | 14                        | 21                       | 14                  | 21                | -5.54416888E-01  | -5.54416891E-01 | 0     | 0.05       | 8                  | 2    | 2.04  |
| synthes3               | 23                        | 34                       | 23                  | 34                | 1.50821846E+01   | 1.50821840E+01  | 0     | 0.05       | 8                  | 2    | 3.85  |
| trimloss2              | 24                        | 53                       | 24                  | 53                | 7.18307944E-01   | 7.18309570E-01  | 0     | 0.07       | 10                 | 2    | 4.11  |
| trimloss4              | 64                        | 145                      | 64                  | 145               | 1.70933112E+00   | 1.70933131E+00  | 0     | 0.12       | 12                 | 2    | 1.77  |
| trimloss5              | 90                        | 216                      | 90                  | 216               | 1.17886860E+00   | 1.17886902E+00  | 0     | 0.21       | 13                 | 2    | 7.39  |
| trimloss6              | 120                       | 287                      | 120                 | 287               | 1.30565472E+00   | 1.30565507E+00  | 0     | 0.26       | 12                 | 2    | 7.39  |
| trimloss7              | 154                       | 436                      | 154                 | 436               | 5.93496892E-01   | 5.93497829E-01  | 0     | 0.57       | 13                 | 2    | 8.08  |
| trimloss12             | 384                       | 1028                     | 384                 | 1028              | 2.31187177E+00   | 2.31187184E+00  | 0     | 6.4        | 17                 | 2    | 9     |
| Avg                    |                           |                          |                     |                   |                  |                 | 0.01  | 5.75       | 13.46              | 1.92 | 3.77  |

Table 5: iOptimize performance on CUTE CP test problems

| Problem  | MOSEK | iOptimize | Problem   | MOSEK | iOptimize | Problem  | MOSEK | iOptimize |
|----------|-------|-----------|-----------|-------|-----------|----------|-------|-----------|
| aug2d    | 6     | 12        | laser     | 12    | 10        | qpcboei1 | 20    | 22        |
| aug2dc   | 6     | 12        | liswet1   | 26    | 19        | qpcboei2 | 21    | 26        |
| aug2dcqp | 13    | 13        | liswet2   | 21    | 17        | qpcstair | 22    | 25        |
| aug2dqp  | 15    | 14        | liswet3   | 21    | 16        | qpilotho | 35§   | 42        |
| aug3d    | 6     | 8         | liswet4   | 26§   | 18        | qrecipe  | 16    | 19        |
| aug3dc   | 6     | 8         | liswet5   | 25    | 16        | qptest   | 6     | 6         |
| aug3dcqp | 11    | 11        | liswet6   | 24    | 18        | qsc205   | 16    | 17        |
| aug3dqp  | 12    | 13        | liswet7   | 31    | 19        | qscagr25 | 20    | 22        |
| cont-050 | 11    | 11        | liswet8   | 38    | 37        | qscagr7  | 19    | 22        |
| cont-100 | 12    | 11        | liswet9   | 37    | 31        | qscfxm1  | 25    | 25        |
| cont-101 | 13    | 9         | liswet10  | 36    | 21        | qscfxm2  | 30    | 33        |
| cont-200 | 12    | 11        | liswet11  | 31    | 22        | qscfxm3  | 30    | 35        |
| cont-201 | 15    | 10        | liswet12  | 30    | 32        | qscorp10 | 13    | 14        |
| cont-300 | 16    | 13        | lotschd   | 10    | 9         | qscrs8   | 21    | 24        |
| cvxqp1_m | 10    | 10        | mosarqp1  | 9     | 9         | qscsd1   | 10    | 9         |
| cvxqp1_s | 8     | 8         | mosarqp2  | 9     | 9         | qscsd6   | 13    | 14        |
| cvxqp2_m | 10    | 10        | powell20  | 10§   | 8         | qscsd8   | 12    | 11        |
| cvxqp2_s | 9     | 10        | primal1   | 10    | 9         | qscstap1 | 18    | 17        |
| cvxqp3_m | 12    | 12        | primal2   | 8     | 7         | qscstap2 | 13    | 13        |
| cvxqp3_s | 10    | 10        | primal3   | 9     | 9         | qscstap3 | 14    | 15        |
| dpk101   | 5     | 3         | primal4   | 10    | 9         | qseba    | 16    | 26        |
| dtoc3    | 5     | 4         | primalc1  | 18    | 18        | qshare1b | 23    | 29        |
| dual1    | 14    | 12        | primalc2  | 15    | 25        | qshare2b | 17    | 17        |
| dual2    | 12    | 9         | primalc5  | 8     | 10        | qshell   | 33    | 38        |
| dual3    | 12    | 9         | primalc8  | 10    | 12        | qship041 | 14    | 14        |
| dual4    | 12    | 10        | q25fv47   | 28    | 27        | qship04s | 13    | 14        |
| dualc1   | 10    | 25        | qadlittle | 11    | 11        | qship081 | 13    | 14        |
| dualc2   | 10    | 20        | qafro     | 12    | 14        | qship08s | 13    | 14        |
| dualc5   | 7     | 13        | qbandm    | 19    | 20        | qship121 | 17    | 16        |
| dualc8   | 7     | 19        | qbeaconf  | 14    | 14        | qship12s | 17    | 17        |
| genhs28  | 4     | 3         | qbre3d    | 13    | 19        | qsierra  | 18    | 20        |
| gouldqp2 | 14    | 13        | qbrandy   | 14    | 17        | qstair   | 22    | 23        |
| gouldqp3 | 10    | 11        | qcapri    | 26    | 36        | qstandat | 15    | 13        |
| hs118    | 10    | 10        | qe226     | 14    | 16        | s268     | 22    | 12        |
| hs21     | 9     | 9         | qetamacr  | 27    | 32        | stadat1  | 25    | 12        |
| hs268    | 22    | 12        | qffff80   | 22    | 25        | stadat2  | 41    | 18        |
| hs35     | 5     | 5         | qforplan  | 23    | 31        | stadat3  | 46    | 19        |
| hs35mod  | 11    | 11        | qgfrdxpn  | 23    | 30        | tame     | 3     | 3         |
| hs51     | 5     | 3         | qgrow15   | 22    | 22        | ubh1     | 6     | 3         |
| hs52     | 4     | 3         | qgrow22   | 25    | 26        | yao      | 23    | 23        |
| hs53     | 6     | 4         | qgrow7    | 23    | 21        | zezevic2 | 5     | 5         |
| hs76     | 5     | 5         | qisrael   | 21    | 28        |          |       |           |
| ksip     | 21    | 16        | qpcblend  | 19    | 17        | Avg      | 16.22 | 15.92     |

<sup>1</sup> §: Near optimal solution found.

Table 6: Comparison with MOSEK on Maros and Mészáros's QP test problems

| Problem      | MOSEK | iOptimize | Problem      | MOSEK       | iOptimize | Problem     | MOSEK     | iOptimize |
|--------------|-------|-----------|--------------|-------------|-----------|-------------|-----------|-----------|
| QQ-aug2d1    | 11    |           | QQ-laser     | <b>135</b>  |           | QQ-qpchoeil | 24        | 24        |
| QQ-aug2dc    | 9     |           | QQ-liswet1   | 41?         |           | QQ-qpchoe2  | 29        | 29        |
| QQ-aug2dcp   | 18    |           | QQ-liswet2   | 21          |           | QQ-qpchoe3  | 24        | 21        |
| QQ-aug2dqp   | †     | 21        | QQ-liswet3   | 17          |           | QQ-qpchoe4  | 39        | 30        |
| QQ-aug3d     | 6     |           | QQ-liswet4   | 17          |           | QQ-qpchoe5  | 16        | 18        |
| QQ-aug3dc    | 7     |           | QQ-liswet5   | 15          |           | QQ-qptest   | 7         | 7         |
| QQ-aug3dcp   | 17    |           | QQ-liswet6   | 17          |           | QQ-qpsc205  | 17        | 17        |
| QQ-aug3dqp   | 22    |           | QQ-liswet7   | 34?         |           | QQ-qscagr25 | 20        | 29        |
| QQ-aug3dqp   | 14    |           | QQ-liswet8   | 49?         |           | QQ-qscagr7  | 18        | 19        |
| QQ-cont-050  | 14    |           | QQ-liswet9   | 26?         |           | QQ-qscfxm1  | 43        | 30        |
| QQ-cont-100  | 15    |           | QQ-liswet10  | 18?         |           | QQ-qscfxm2  | 39        | 36        |
| QQ-cont-101  | 12    |           | QQ-liswet11  | 27?         |           | QQ-qscfxm3  | 26        | 37        |
| QQ-cont-200  | 19    |           | QQ-liswet12  | 24?         |           | QQ-qscorp10 | 17        | 16        |
| QQ-cont-201  | 14    |           | QQ-lotschd   | 15          |           | QQ-qscrs8   | 24        | 24        |
| QQ-cont-300  | 15    |           | QQ-mosarqp1  | 15          |           | QQ-qscsd1   | 13        | 11        |
| QQ-cvxqpl_m  | 15    |           | QQ-mosarqp2  | 14          |           | QQ-qscsd6   | 17        | 15        |
| QQ-cvxqpl_s  | 15    |           | QQ-powell20  | †           |           | QQ-qscsd8   | 16        | 12        |
| QQ-cvxqpl2_m | 18    |           | QQ-primal1   | 11          |           | QQ-qscsd1   | 17        | 15        |
| QQ-cvxqpl2_s | 12    |           | QQ-primal2   | 9           |           | QQ-qscsd6   | 16        | 12        |
| QQ-cvxqpl3_m | 18    |           | QQ-primal3   | 13          |           | QQ-qscsd8   | 16        | 12        |
| QQ-cvxqpl3_s | 14    |           | QQ-primal4   | 9           |           | QQ-qscsd1   | 18        | 13        |
| QQ-dpk101    | 6     |           | QQ-primac1   | 11          |           | QQ-qscsd6   | 18        | 14        |
| QQ-dtocc3    | 11    |           | QQ-primac2   | 20          |           | QQ-qscsd1   | <b>62</b> | 28        |
| QQ-dual1     | 14    |           | QQ-primac5   | 18          |           | QQ-qshare1b | 27        | 26        |
| QQ-dual2     | 13    |           | QQ-primac8   | 11          |           | QQ-qshare2b | 19        | 19        |
| QQ-dual3     | 14    |           | QQ-q25fv47   | 15          |           | QQ-qshell   | 26        | 30        |
| QQ-dual4     | 13    |           | QQ-qadlittle | 39          |           | QQ-qship041 | 21        | 15        |
| QQ-dualc1    | 17    |           | QQ-qafiro    | 19          |           | QQ-qship04s | 18        | 14        |
| QQ-dualc2    | 14    |           | QQ-qbandm    | 16          |           | QQ-qship081 | 20        | 15        |
| QQ-dualc5    | 11    |           | QQ-qbeaconf  | 21          |           | QQ-qship121 | 21        | 15        |
| QQ-dualc8    | 18    |           | QQ-qchore3d  | 12          |           | QQ-qship12s | 24        | 19        |
| QQ-genhs28   | 5     |           | QQ-qcappri   | 14          |           | QQ-qsierra  | 24        | 20        |
| QQ-gouldqp2  | 13    |           | QQ-qetamacr  | 17          |           | QQ-qstair   | 31        | 24        |
| QQ-gouldqp3  | 13    |           | QQ-qfifff80  | 26          |           | QQ-qstandat | 16        | 17        |
| QQ-hs118     | 11    |           | QQ-qforplan  | 17          |           | QQ-qstadar2 | 13        | 15        |
| QQ-hs21      | 13    |           | QQ-qgfrdxpn  | 24          |           | QQ-qstadar3 | 18        | 18        |
| QQ-hs268     | 13    |           | QQ-qgrow15   | 30          |           | QQ-qstadar1 | 53        | 19        |
| QQ-hs35      | 6     |           | QQ-qgrow22   | <b>1808</b> |           | QQ-qstadar2 | 18        | 18        |
| QQ-hs35mod   | 13    |           | QQ-qgrow7    | 25          |           | QQ-tame     | 5         | 6         |
| QQ-hs51      | 5     |           | QQ-qisrael   | 21          |           | QQ-ubh1     | 20        | 5         |
| QQ-hs52      | 6     |           | QQ-qpblend   | 28          |           | QQ-yao      | 278       | 23        |
| QQ-hs53      | 10    |           |              | 21          |           | QQ-zecevic2 | 6         | 7         |
| QQ-hs76      | 8     |           |              | 28          |           | Avg1        | 20.91     | 16.43     |
| QQ-ksip      | 15    |           |              | 20          |           | Avg2        | 18.34     | 16.26     |

†: Max number of iterations reached.  
 ‡: Near optimal solution found.  
 †?: Terminated with unknown status.

Table 7: Comparison with MOSEK on Mittelmann's QCQP test problems

| Problem   | MOSEK | iOptimize |
|-----------|-------|-----------|
| airport   | 26    | 28        |
| polak4    | 10    | 13        |
| makela1   | 8     | 8         |
| makela2   | 7     | 7         |
| makela3   | 6     | 8         |
| gigomez1  | 8     | 9         |
| hanging   | 13    | 10        |
| madsschj  | 10    | 11        |
| rosenmx   | 9     | 8         |
| optreward | 10    | 10        |
| optprloc  | 18    | 16        |
| Avg       | 11.36 | 11.64     |

**Table 8** Comparison with MOSEK on Cute QCQP test problems

| Problem                | MOSEK      | iOptimize | Ipopt      | Knitro     |
|------------------------|------------|-----------|------------|------------|
| bigbank                | 20         | 21        | 24         | 19         |
| gridnetf               | 9          | 7         | 5          | 4          |
| gridnetf               | 16         | 13        | 27         | 17         |
| gridneth               | 8          | 6         | 6          | 3          |
| gridneti               | 10         | 8         | 7          | 6          |
| dallasl                | <b>74</b>  | 33        | <b>249</b> | <b>245</b> |
| dallasm                | <b>128</b> | 31        | ‡          | ‡          |
| dallass                | †          | 31        | †          | <b>135</b> |
| polak1                 | 6          | 5         | 4          | 2          |
| polak2                 | 6          | 5         | 4          | 1          |
| polak3                 | 10         | 8         | ‡          | ‡          |
| polak5                 | 6          | 5         | 24         | 12         |
| sembank                | 14         | 27        | 12         | 11         |
| cantilvr               | 12         | 12        | 5          | 3          |
| cb2                    | 8          | 8         | 4          | 3          |
| cb3                    | 7          | 7         | 4          | 4          |
| chaconn1               | 8          | 8         | 4          | 3          |
| chaconn2               | 7          | 7         | 4          | 4          |
| dipigri                | 14         | 10        | 6          | 2          |
| gpp                    | 12         | 10        | 22         | 11         |
| hong                   | 13         | 15        | 11         | 7          |
| loadbal                | 22         | 21        | 13         | 7          |
| svanberg               | 14         | 14        | 30         | 16         |
| <hr/>                  |            |           |            |            |
| antenna\antenna2       | 21§        | 16        | <b>178</b> | <b>58</b>  |
| antenna\antenna_vareps | 19         | 18        | <b>106</b> | <b>61</b>  |
| braess\trafequil       | 15         | 16        | 18         | 22         |
| braess\trafequil2      | 11         | 13        | 26         | 13         |
| braess\trafequilsf     | 14         | 15        | 18         | 24         |
| braess\trafequil2sf    | 12         | 12        | 25         | 12         |
| elena\chemeq           | 23         | 20        | 37         | 16         |
| elena\s383             | <b>85</b>  | 21        | 18         | 8          |
| firfilter\fir_convex   | 33§        | 13        | 27         | 11         |
| markowitz\growthopt    | 8          | 7         | 8          | 7          |
| wbv\antenna2           | 15         | 13        | 31         | 16         |
| wbv\lowpass2           | 30§        | 22        | 31         | <b>66</b>  |
| <hr/>                  |            |           |            |            |
| batch                  | 13         | 12        | 13         | 16         |
| stockcycle             | 11         | 10        | 23         | 12         |
| synthes1               | 6          | 6         | 6          | 6          |
| synthes2               | 8          | 8         | 10         | 7          |
| synthes3               | 8          | 8         | 9          | 8          |
| trimloss2              | 10         | 10        | 13         | 7          |
| trimloss4              | 11         | 12        | 16         | 8          |
| trimloss5              | 13         | 13        | 20         | 10         |
| trimloss6              | 12         | 12        | 23         | 11         |
| trimloss7              | 13         | 13        | 35         | 14         |
| trimloss12             | 19         | 17        | 41         | 22         |
| <hr/>                  |            |           |            |            |
| Avg1                   | 18.53      | 13.07     | –          | –          |
| Avg2                   | 13.02      | 11.98     | –          | –          |

<sup>1</sup> †: Max number of iterations reached.

<sup>2</sup> §: Near optimal solution found.

<sup>3</sup> ‡: Function evaluate error from AMPL.

**Table 9** Comparison with MOSEK, Ipopt, and Knitro on CP test problems

| Problem      | Presolve Time | Solver Time | Iters | Avg Dirs | Prop $\Phi$ (%) |
|--------------|---------------|-------------|-------|----------|-----------------|
| iQQ-aug2d    | 0.01          | 7.14        | 16    | 1.69     | 4.78            |
| iQQ-aug2dc   | 0.01          | 6.8         | 16    | 1.69     | 4.34            |
| iQQ-aug2dcqp | 0.78          | 13.44       | 29    | 1.34     | 4.5             |
| iQQ-aug2dqp  | 0.73          | 13.4        | 29    | 1.34     | 4.44            |
| iQQ-aug3d    | 0             | 4.72        | 35    | 1.09     | 2.43            |
| iQQ-aug3dc   | 0             | 1.06        | 16    | 1.5      | 5.13            |
| iQQ-aug3dcqp | 0.04          | 2.59        | 33    | 1.09     | 4.1             |
| iQQ-aug3dqp  | 0.03          | 2.68        | 37    | 1.05     | 4.4             |
| iQQ-cont-050 | 0             | 0.76        | 9     | 2        | 4.72            |
| iQQ-cont-100 | 0.01          | 6.7         | 14    | 1.93     | 2.17            |
| iQQ-cont-101 | 0             | 3.33        | 9     | 2        | 2.35            |
| iQQ-cont-200 | 0.03          | 47.74       | 14    | 2        | 1.71            |
| iQQ-cont-201 | 0.03          | 26.08       | 9     | 2        | 2.09            |
| iQQ-cont-300 | 0.05          | 104.79      | 9     | 2        | 1.57            |
| iQQ-cvxqp1_m | 0             | 2.19        | 26    | 1.38     | 1.38            |
| iQQ-cvxqp1_s | 0             | 2.24        | 35    | 1.2      | 0.45            |
| iQQ-cvxqp2_m | 0             | 2.14        | 29    | 1.34     | 0.9             |
| iQQ-cvxqp2_s | 0             | 2.41        | 37    | 1.19     | 0.92            |
| iQQ-cvxqp3_m | 0             | 2.85        | 30    | 1.23     | 1.8             |
| iQQ-cvxqp3_s | 0             | 1.22        | 35    | 1.17     | 0.98            |
| iQQ-dpklo1   | 0             | 0.36        | 13    | 2        | 0.83            |
| iQQ-dtoc3    | 0.32          | 4.21        | 15    | 1.87     | 5.9             |
| iQQ-dual1    | 0             | 1.14        | 31    | 1.32     | 0.88            |
| iQQ-dual2    | 0             | 0.52        | 16    | 1.69     | 0               |
| iQQ-dual3    | 0             | 0.63        | 18    | 1.67     | 1.61            |
| iQQ-dual4    | 0             | 1.23        | 33    | 1.33     | 0               |
| iQQ-dualc1   | 0             | 1.06        | 35    | 1.66     | 0               |
| iQQ-dualc2   | 0             | 1.19        | 35    | 1.57     | 0.59            |
| iQQ-dualc5   | 0             | 1.65        | 44    | 1.32     | 1.04            |
| iQQ-dualc8   | 0             | 1.06        | 34    | 1.68     | 1.9             |
| iQQ-genhs28  | 0             | 0.37        | 13    | 2        | 0               |
| iQQ-gouldqp2 | 0             | 0.27        | 10    | 2        | 0               |
| iQQ-gouldqp3 | 0             | 0.56        | 16    | 1.63     | 1.82            |
| iQQ-hs118    | 0             | 0.27        | 11    | 2        | 0               |
| iQQ-hs21     | 0.02          | 1.2         | 35    | 1.11     | 0.08            |
| iQQ-hs268    | 0             | 1.52        | 45    | 1.11     | 0               |
| iQQ-hs35     | 0             | 0.52        | 16    | 1.75     | 0               |
| iQQ-hs35mod  | 0             | 0.54        | 16    | 1.75     | 0.19            |
| iQQ-hs51     | 0             | 1.07        | 27    | 1.19     | 0               |
| iQQ-hs52     | 0             | 0.73        | 26    | 1.31     | 0               |
| iQQ-hs53     | 0             | 1.41        | 39    | 1.13     | 0               |
| iQQ-hs76     | 0             | 0.36        | 13    | 2        | 0               |
| iQQ-ksip     | 0             | 1.73        | 42    | 1.05     | 3.3             |

| Problem       | Presolve Time | Solver Time | Iters | Avg Dirs | Prop $\Phi$ (%) |
|---------------|---------------|-------------|-------|----------|-----------------|
| iQQ-laser     | 0             | 0.4         | 13    | 2        | 5.22            |
| iQQ-liswet1   | 0.01          | 16.43       | 42    | 1.14     | 4.19            |
| iQQ-liswet2   | 0.02          | 17.23       | 43    | 1.12     | 4.9             |
| iQQ-liswet3   | 0.01          | 15          | 38    | 1.16     | 5.15            |
| iQQ-liswet4   | 0.01          | 15.72       | 40    | 1.13     | 5.16            |
| iQQ-liswet5   | 0.01          | 18.09       | 47    | 1.17     | 4.49            |
| iQQ-liswet6   | 0.02          | 16.79       | 43    | 1.14     | 4.64            |
| iQQ-liswet7   | 0.01          | 15.81       | 40    | 1.13     | 5.12            |
| iQQ-liswet8   | 0.01          | 14.03       | 33    | 1.15     | 4.37            |
| iQQ-liswet9   | 0.01          | 15.69       | 37    | 1.14     | 4.69            |
| iQQ-liswet10  | 0.02          | 16.5        | 42    | 1.14     | 4.97            |
| iQQ-liswet11  | 0.01          | 16.33       | 42    | 1.14     | 4.9             |
| iQQ-liswet12  | 0.01          | 15.73       | 38    | 1.13     | 4.62            |
| iQQ-lotschd   | 0             | 0.3         | 12    | 2        | 0               |
| iQQ-mosarqp1  | 0             | 2.04        | 33    | 1.09     | 4.55            |
| iQQ-mosarqp2  | 0             | 1.41        | 38    | 1.08     | 3.57            |
| iQQ-powell20  | 0.02          | 6.5         | 16    | 1.63     | 3.5             |
| iQQ-primal1   | 0.01          | 1.28        | 43    | 1.09     | 1.41            |
| iQQ-primal2   | 0             | 1.31        | 37    | 1.14     | 2.47            |
| iQQ-primal3   | 0             | 1.58        | 41    | 1.1      | 2.24            |
| iQQ-primal4   | 0.01          | 1.56        | 36    | 1.17     | 4.44            |
| iQQ-primalc1  | 0             | 1.37        | 42    | 1.26     | 1.03            |
| iQQ-primalc2  | 0             | 1.32        | 36    | 1.33     | 1.52            |
| iQQ-primalc5  | 0             | 0.97        | 23    | 1.39     | 0.93            |
| iQQ-primalc8  | 0             | 1.1         | 32    | 1.28     | 1.01            |
| iQQ-q25fv47   | 0.01          | 1.4         | 15    | 2        | 6.42            |
| iQQ-qadlittle | 0             | 0.34        | 14    | 2        | 0.59            |
| iQQ-qafiro    | 0             | 1.37        | 39    | 1.15     | 0.07            |
| iQQ-qbandm    | 0             | 0.34        | 14    | 1.86     | 3.02            |
| iQQ-qbeaconf  | 0             | 0.41        | 14    | 1.93     | 0.5             |
| iQQ-qbore3d   | 0             | 0.51        | 18    | 1.89     | 0               |
| iQQ-qbrandy   | 0             | 0.48        | 16    | 1.88     | 0.41            |
| iQQ-qcapri    | 0             | 0.62        | 22    | 1.91     | 1.63            |
| iQQ-qe226     | 0             | 1.41        | 36    | 1.22     | 1.85            |
| iQQ-qetamacr  | 0             | 1.09        | 34    | 1.21     | 3.17            |
| iQQ-qffff80   | 0             | 0.57        | 20    | 1.8      | 3.57            |
| iQQ-qforplan  | 0.01          | 0.25        | 11    | 2        | 1.63            |
| iQQ-qgfrdxpn  | 0.01          | 0.47        | 19    | 2        | 2.42            |
| iQQ-qgrow15   | 0             | 0.44        | 16    | 1.94     | 1.15            |
| iQQ-qgrow22   | 0.01          | 0.54        | 18    | 1.89     | 0               |
| iQQ-qgrow7    | 0             | 0.56        | 18    | 1.89     | 0.54            |
| iQQ-qisrael   | 0             | 0.47        | 19    | 2        | 1.3             |
| iQQ-qpcblend  | 0             | 1.5         | 38    | 1.16     | 0.27            |

| Problem      | Presolve Time | Solver Time | Iters | Avg Dirs | Prop $\Phi$ (%) |
|--------------|---------------|-------------|-------|----------|-----------------|
| iQQ-qpcboei1 | 0.01          | 0.31        | 12    | 2        | 6.06            |
| iQQ-qpcboei2 | 0             | 0.44        | 17    | 1.94     | 4.65            |
| iQQ-qpcstair | 0.01          | 0.64        | 20    | 1.75     | 1.27            |
| iQQ-qpilotno | 0.04          | 0.65        | 16    | 2        | 3.84            |
| iQQ-qrecipe  | 0             | 0.75        | 20    | 1.6      | 0.13            |
| iQQ-qpctest  | 0             | 0.56        | 16    | 1.81     | 0.18            |
| iQQ-qsc205   | 0             | 1.51        | 41    | 1.24     | 1.35            |
| iQQ-qscagr25 | 0             | 0.32        | 14    | 2        | 0.32            |
| iQQ-qscagr7  | 0             | 0.33        | 14    | 2        | 1.22            |
| iQQ-qscfxm1  | 0             | 0.4         | 15    | 1.93     | 1.79            |
| iQQ-qscfxm2  | 0             | 0.42        | 16    | 1.94     | 2.44            |
| iQQ-qscfxm3  | 0             | 0.54        | 16    | 1.94     | 4.71            |
| iQQ-qscorpio | 0             | 0.95        | 25    | 1.24     | 1.91            |
| iQQ-qscrs8   | 0             | 0.63        | 22    | 1.73     | 6.45            |
| iQQ-qscsd1   | 0             | 0.84        | 20    | 1.6      | 1.31            |
| iQQ-qscsd6   | 0             | 0.89        | 22    | 1.64     | 2.07            |
| iQQ-qscsd8   | 0             | 2.02        | 37    | 1.11     | 5.11            |
| iQQ-qscstap1 | 0             | 1.07        | 36    | 1.19     | 1.14            |
| iQQ-qscstap2 | 0             | 2.26        | 40    | 1.13     | 3.58            |
| iQQ-qscstap3 | 0             | 2.26        | 32    | 1.22     | 3.65            |
| iQQ-qseba    | 0.02          | 0.57        | 20    | 1.85     | 5.36            |
| iQQ-qshare1b | 0             | 0.44        | 17    | 1.94     | 2.33            |
| iQQ-qshare2b | 0             | 0.47        | 13    | 1.69     | 2.13            |
| iQQ-qshell   | 0.02          | 0.82        | 17    | 2        | 6.4             |
| iQQ-qship04l | 0             | 0.31        | 11    | 2        | 0               |
| iQQ-qship04s | 0.01          | 0.25        | 11    | 2        | 6.88            |
| iQQ-qship08l | 0.01          | 1.63        | 16    | 1.94     | 4.56            |
| iQQ-qship08s | 0             | 0.72        | 17    | 1.88     | 3.73            |
| iQQ-qship12l | 0.01          | 2.96        | 17    | 1.71     | 4.74            |
| iQQ-qship12s | 0.01          | 0.99        | 18    | 1.83     | 2.98            |
| iQQ-qsierra  | 0             | 0.64        | 17    | 2        | 5               |
| iQQ-qstair   | 0             | 0.39        | 17    | 2        | 1.05            |
| iQQ-qstandat | 0.01          | 1.37        | 39    | 1.18     | 2.05            |
| iQQ-s268     | 0             | 1.56        | 45    | 1.11     | 0.06            |
| iQQ-stadat1  | 0.01          | 3.13        | 26    | 1.23     | 4.19            |
| iQQ-stadat2  | 0             | 4.39        | 35    | 1.14     | 4.42            |
| iQQ-stadat3  | 0.01          | 6.18        | 25    | 1.2      | 4.25            |
| iQQ-tame     | 0             | 0.23        | 10    | 2        | 0               |
| iQQ-ubh1     | 0.46          | 5.73        | 26    | 1.96     | 6.21            |
| iQQ-yao      | 0.01          | 3.17        | 38    | 1.05     | 4.85            |
| iQQ-zecevic2 | 0             | 0.23        | 9     | 2        | 0               |
| Avg          | 0.02          | 4.40        | 25.30 | 1.56     | 2.48            |

**Table 10** iOptimize performance on Maros and Mészáros’s QCQP infeasible test problems

| Problem    | Presolve Time | Solver Time | Iters | Avg Dirs | Prop $\Phi$ (%) |
|------------|---------------|-------------|-------|----------|-----------------|
| iairport   | 0.01          | 0.6         | 19    | 1.63     | 0.67            |
| ipolak4    | 0             | 0.81        | 25    | 1.28     | 0.12            |
| imakela1   | 0             | 1.11        | 32    | 1.13     | 0               |
| imakela2   | 0             | 1.13        | 32    | 1.13     | 0               |
| imakela3   | 0             | 0.32        | 14    | 2        | 0               |
| igigomez1  | 0             | 1.02        | 26    | 1.19     | 0               |
| ihanging   | 0             | 1.17        | 30    | 1.13     | 4.27            |
| imadsschj  | 0.06          | 0.53        | 17    | 1.59     | 0.76            |
| irosemmx   | 0             | 1           | 35    | 1.14     | 0               |
| ioptreward | 0             | 0.64        | 20    | 1.55     | 0               |
| ioptprloc  | 0             | 0.92        | 21    | 1.52     | 0.11            |
| Avg        | 0.01          | 0.84        | 24.64 | 1.39     | 0.54            |

**Table 11** iOptimize performance on CUTE QCQP infeasible test problems

| Problem                 | Presolve Time | Solver Time | Iters | Avg Dirs | Prop $\Phi$ (%) |
|-------------------------|---------------|-------------|-------|----------|-----------------|
| ibigbank                | 0             | 17.12       | 27    | 1.33     | 6.06            |
| igrinete                | 0             | 81.51       | 14    | 1.71     | 6.79            |
| igrinetf                | 0             | 377.58      | 36    | 1.08     | 5.67            |
| igrineth                | 0.02          | 0.78        | 23    | 1.39     | 0.26            |
| igrineti                | 0             | 1.23        | 40    | 1.07     | 1.15            |
| idallas <sup>‡</sup>    |               |             |       |          |                 |
| idallasm                | 0.01          | 1.96        | 47    | 1.4      | 2.26            |
| idallass                | 0             | 1.58        | 45    | 1.22     | 0.51            |
| ipolak1                 | 0             | 0.41        | 16    | 1.81     | 0               |
| ipolak2                 | 0             | 0.32        | 13    | 2        | 0               |
| ipolak3                 | 0             | 0.77        | 27    | 1.3      | 0.52            |
| ipolak5                 | 0             | 0.41        | 13    | 2        | 0.25            |
| ismbank                 | 0             | 1.13        | 31    | 1.13     | 1.7             |
| icantilvr               | 0             | 0.29        | 12    | 2        | 0.35            |
| icb2                    | 0             | 0.94        | 32    | 1.19     | 0               |
| icb3                    | 0.01          | 1.25        | 31    | 1.16     | 0.24            |
| ichaconn1               | 0             | 0.95        | 32    | 1.19     | 0               |
| ichaconn2               | 0             | 1.26        | 31    | 1.16     | 0.08            |
| idipigri                | 0             | 1.29        | 32    | 1.19     | 0.08            |
| igpp                    | 0             | 34.24       | 38    | 1.11     | 5.34            |
| ihong                   | 0             | 0.92        | 22    | 1.45     | 0.11            |
| iloadbal                | 0             | 0.37        | 14    | 2        | 0.27            |
| isvanberg               | 0.08          | 632.99      | 27    | 1.22     | 6.65            |
| <hr/>                   |               |             |       |          |                 |
| antenna-iantenna2       | 0             | 68.79       | 186   | 1.65     | 13.31           |
| antenna-iantenna_vareps | 0             | 48.02       | 47    | 1.13     | 5.83            |
| braess-itrafеquїl       | 0             | 4.77        | 38    | 1.37     | 3.1             |
| braess-itrafеquїl2      | 0             | 1.87        | 9     | 2        | 7.34            |
| braess-itrafеquїl2sf    | 0             | 9.23        | 46    | 1.26     | 2.71            |
| braess-itrafеquїl2sf    | 0             | 2.56        | 9     | 2        | 7.16            |
| elena-ichemeq           | 0             | 0.06        | 14    | 2        | 4.92            |
| elena-is383             | 0             | 0.06        | 14    | 1.93     | 1.64            |
| fırfilter-ifır_convex   | 0             | 0.75        | 13    | 1.92     | 6.03            |
| markowitz-ıgrowthopt    | 0             | 0.08        | 16    | 1.69     | 0               |
| wbv-ıantenna2           | 0.06          | 119.88      | 17    | 2        | 7.97            |
| wbv-ılowpass2           | 0             | 4.54        | 13    | 1.92     | 7.35            |
| <hr/>                   |               |             |       |          |                 |
| ibatch                  | 0             | 0.15        | 22    | 1.36     | 3.47            |
| ıstockcycle             | 0             | 0.88        | 35    | 1.14     | 6.29            |
| ısynthes1               | 0             | 0.09        | 25    | 1.36     | 0               |
| ısynthes2               | 0             | 0.09        | 23    | 1.35     | 1.15            |
| ısynthes3               | 0             | 0.18        | 40    | 1.1      | 3.91            |
| ıtrimloss2              | 0             | 0.1         | 15    | 1.93     | 0               |
| ıtrimloss4              | 0             | 0.15        | 16    | 1.94     | 7.43            |
| ıtrimloss5              | 0             | 0.22        | 15    | 2        | 6.07            |
| ıtrimloss6              | 0             | 0.37        | 15    | 2        | 7.32            |
| ıtrimloss7              | 0             | 0.84        | 16    | 2        | 6.58            |
| ıtrimloss12             | 0.01          | 7.79        | 16    | 2        | 7.41            |
| <hr/>                   |               |             |       |          |                 |
| Avg                     | 0.00          | 31.79       | 28.07 | 1.56     | 3.45            |

<sup>‡</sup> ‡: Function evaluate error from AMPL.

**Table 12** iOptimize performance on Cute CP infeasible test problems

| Problem      | MOSEK      | iOptimize | Problem       | MOSEK      | iOptimize | Problem      | MOSEK      | iOptimize |
|--------------|------------|-----------|---------------|------------|-----------|--------------|------------|-----------|
| iQQ-aug2d    | †          | 16        | iQQ-laser     | 29         | 13        | iQQ-qpcboei1 | †          | 12        |
| iQQ-aug2dc   | †          | 16        | iQQ-liswet1   | 31         | 42        | iQQ-qpcboei2 | †          | 17        |
| iQQ-aug2dcqp | †          | 29        | iQQ-liswet2   | 30         | 43        | iQQ-qpcstair | †          | 20        |
| iQQ-aug2dqp  | 24         | 29        | iQQ-liswet3   | 30         | 38        | iQQ-qpilotno | †          | 16        |
| iQQ-aug3d    | 21         | 35        | iQQ-liswet4   | 30         | 40        | iQQ-qrecipe  | 12         | 20        |
| iQQ-aug3dc   | 16         | 16        | iQQ-liswet5   | 21         | 47        | iQQ-qptest   | 15         | 16        |
| iQQ-aug3dcqp | <b>121</b> | 33        | iQQ-liswet6   | 30         | 43        | iQQ-qsc205   | 16         | 41        |
| iQQ-aug3dqp  | <b>95</b>  | 37        | iQQ-liswet7   | 24         | 40        | iQQ-qscagr25 | 383?       | 14        |
| iQQ-cont-050 | †          | 9         | iQQ-liswet8   | 26         | 33        | iQQ-qscagr7  | 38         | 14        |
| iQQ-cont-100 | †          | 14        | iQQ-liswet9   | 24         | 37        | iQQ-qscfxm1  | †          | 15        |
| iQQ-cont-101 | †          | 9         | iQQ-liswet10  | 30         | 42        | iQQ-qscfxm2  | †          | 16        |
| iQQ-cont-200 | †          | 14        | iQQ-liswet11  | 30         | 42        | iQQ-qscfxm3  | †          | 16        |
| iQQ-cont-201 | <b>70</b>  | 9         | iQQ-liswet12  | 24         | 38        | iQQ-qscorpio | 31         | 25        |
| iQQ-cont-300 | †          | 9         | iQQ-lotschd   | 26         | 12        | iQQ-qscrs8   | 52         | 22        |
| iQQ-cvxqp1_m | †          | 26        | iQQ-mosarqp1  | <b>100</b> | 33        | iQQ-qscsd1   | 28         | 20        |
| iQQ-cvxqp1_s | 21         | 35        | iQQ-mosarqp2  | <b>66</b>  | 38        | iQQ-qscsd6   | 25         | 22        |
| iQQ-cvxqp2_m | <b>97</b>  | 29        | iQQ-powell20  | †          | 16        | iQQ-qscsd8   | 30         | 37        |
| iQQ-cvxqp2_s | 18         | 37        | iQQ-primal1   | 31         | 43        | iQQ-qscstap1 | 38         | 36        |
| iQQ-cvxqp3_m | †          | 30        | iQQ-primal2   | 32         | 37        | iQQ-qscstap2 | †          | 40        |
| iQQ-cvxqp3_s | 22         | 35        | iQQ-primal3   | 33         | 41        | iQQ-qscstap3 | <b>87</b>  | 32        |
| iQQ-dpktol   | †          | 13        | iQQ-primal4   | 34         | 36        | iQQ-qshare1b | 28         | 20        |
| iQQ-dtocc3   | 24         | 15        | iQQ-primalc1  | 36         | 42        | iQQ-qshare2b | 51         | 17        |
| iQQ-dual1    | 10         | 31        | iQQ-primalc2  | 19         | 36        | iQQ-qshell   | <b>175</b> | 13        |
| iQQ-dual2    | 9          | 16        | iQQ-primalc5  | 22         | 23        | iQQ-qship    | 20         | 17        |
| iQQ-dual3    | 9          | 18        | iQQ-primalc8  | 24         | 32        | iQQ-qship04l | 15         | 11        |
| iQQ-dual4    | 9          | 33        | iQQ-q25fv47   | †          | 15        | iQQ-qship04s | 15         | 11        |
| iQQ-dualc1   | 18         | 35        | iQQ-qadlittle | †          | 14        | iQQ-qship08l | †          | 16        |
| iQQ-dualc2   | 15         | 35        | iQQ-qafiro    | <b>70</b>  | 39        | iQQ-qship08s | †          | 17        |
| iQQ-dualc5   | 10         | 44        | iQQ-qbandm    | 37         | 14        | iQQ-qship12l | †          | 17        |
| iQQ-dualc8   | 30         | 34        | iQQ-qbeaconf  | 26         | 14        | iQQ-qship12s | †          | 18        |
| iQQ-genhs28  | †          | 13        | iQQ-qbore3d   | 10         | 18        | iQQ-qstair   | †          | 17        |
| iQQ-gouldqp2 | 10         | 10        | iQQ-qbrandy   | †          | 16        | iQQ-qstandat | 353?       | 17        |
| iQQ-gouldqp3 | 14         | 16        | iQQ-qcapri    | †          | 22        | iQQ-s268     | <b>340</b> | 39        |
| iQQ-hs118    | <b>232</b> | 11        | iQQ-qe226     | <b>281</b> | 36        | iQQ-stadat1  | 26         | 45        |
| iQQ-hs21     | 40         | 35        | iQQ-qetamacr  | †          | 34        | iQQ-stadat2  | 16         | 26        |
| iQQ-hs268    | 26         | 45        | iQQ-qfffff80  | †          | 20        | iQQ-stadat3  | †          | 35        |
| iQQ-hs35     | <b>72</b>  | 16        | iQQ-qforplan  | 21         | 11        | iQQ-stadat3  | †          | 25        |
| iQQ-hs35mod  | 25         | 16        | iQQ-qgfrdxpn  | 21         | 19        | iQQ-tame     | 6          | 10        |
| iQQ-hs51     | 29         | 27        | iQQ-qgrow15   | 22         | 16        | iQQ-ubh1     | †          | 26        |
| iQQ-hs52     | 22         | 26        | iQQ-qgrow22   | 25         | 18        | iQQ-yao      | 27         | 38        |
| iQQ-hs53     | 27         | 39        | iQQ-qgrow7    | 22         | 18        | iQQ-zecevic2 | 8          | 9         |
| iQQ-hs76     | <b>69</b>  | 13        | iQQ-qisrael   | †          | 19        | Avg1         | 42.20      | 28.15     |
| iQQ-ksip     | 30         | 42        | iQQ-qpcblend  | <b>105</b> | 38        | Avg2         | 27.39      | 28.15     |

<sup>1</sup> †: Max number of iterations reached.

<sup>2</sup> ?: Terminated with unknown status.

Table 13: Comparison with MOSEK on Maros and Mészáros's QCQP infeasible test problems

| Problem    | MOSEK | iOptimize |
|------------|-------|-----------|
| iairport   | 10    | 19        |
| ipolak4    | †     | 25        |
| imakela1   | 28    | 32        |
| imakela2   | 29    | 32        |
| imakela3   | 8     | 14        |
| igomez1    | 26    | 26        |
| ihanging   | 32    | 30        |
| imadsschj  | 24    | 17        |
| irosemmx   | 27    | 35        |
| ioptreward | 11    | 20        |
| ioptprloc  | 8     | 21        |
| Avg        | 20.30 | 24.60     |

<sup>1</sup> †: Max number of iterations reached.

**Table 14** Comparison with MOSEK on Cute QCQP infeasible test problems

| Problem                 | MOSEK      | iOptimize  | Ipopt      | Knitro       |
|-------------------------|------------|------------|------------|--------------|
| ibigbank                | <b>196</b> | 27         | 48         | 42           |
| igrinet                 | <b>134</b> | 14         | 21         | †            |
| igrinetf                | †          | 36         | 42         | †            |
| igrineth                | <b>202</b> | 23         | 25         | 18           |
| igrinethi               | †          | 40         | 40         | <b>133</b> § |
| idallasl                | ‡          | ‡          | 50§        | ‡            |
| idallasm                | ‡          | 47         | ‡          | 0            |
| idallasm                | ‡          | 45         | ‡          | 0            |
| ipolak1                 | 50         | 16         | ‡          | ‡            |
| ipolak2                 | 7          | 13         | ‡          | ‡            |
| ipolak3                 | <b>178</b> | 27         | ◇          | †            |
| ipolak5                 | 7          | 13         | 37         | †            |
| ismbank                 | <b>165</b> | 31         | 34         | 37           |
| icantilvr               | 0          | 12         | 25         | 0            |
| icb2                    | <b>196</b> | 32         | ◇          | 18           |
| icb3                    | <b>196</b> | 31         | †          | 8            |
| ichaconn1               | <b>196</b> | 32         | ◇          | 6            |
| ichaconn2               | <b>196</b> | 31         | 10         | 17           |
| idipigri                | <b>157</b> | 32         | <b>188</b> | †            |
| igpp                    | †          | 38         | <b>65</b>  | †            |
| ihong                   | 11         | 22         | 16         | †            |
| iloadbal                | <b>123</b> | 14         | 22         | †            |
| isvanberg               | †          | 27         | 48         | 53           |
| <hr/>                   |            |            |            |              |
| antenna\iantenna2       | †          | <b>186</b> | †          | <b>156</b>   |
| antenna\iantenna_vareps | †          | 47         | †          | †            |
| braess\itrafequil       | 43         | 38         | 36         | <b>126</b>   |
| braess\itrafequil2      | 7          | 9          | <b>82</b>  | 50           |
| braess\itrafequilsf     | 47         | 46         | 34         | <b>103</b>   |
| braess\itrafequil2sf    | †          | 9          | 54         | <b>91</b>    |
| elena\ichemeq           | 14         | 14         | <b>102</b> | 16           |
| elena\is383             | 7          | 14         | <b>67</b>  | †            |
| firfilter\ifir_convex   | 0          | 13         | <b>99</b>  | 0            |
| markowitz\igrowthopt    | 15         | 16         | 22         | †            |
| wbv\iantenna2           | 0          | 17         | 32         | 0            |
| wbv\ilowpass2           | 0          | 13         | 32         | 0            |
| <hr/>                   |            |            |            |              |
| ibatch                  | 0          | 22         | 32         | <b>158</b>   |
| istockcycle             | <b>117</b> | 35         | <b>72</b>  | †            |
| isynthes1               | 9          | 25         | 35         | 35           |
| isynthes2               | <b>62</b>  | 23         | 48         | 46           |
| isynthes3               | 53         | 40         | <b>94</b>  | †            |
| itrimloss2              | 0          | 15         | 52         | 0            |
| itrimloss4              | 0          | 16         | 40         | 0            |
| itrimloss5              | 0          | 15         | <b>60</b>  | 0            |
| itrimloss6              | 0          | 15         | 55         | 0            |
| itrimloss7              | 0          | 16         | <b>61</b>  | 0            |
| itrimloss12             | 0          | 16         | <b>73</b>  | 0            |
| <hr/>                   |            |            |            |              |
| Avg1                    | 66.33      | 19.44      | –          | –            |
| Avg2                    | 11.74      | 16.04      | –          | –            |

<sup>1</sup> †: Max number of iterations reached.

<sup>2</sup> ‡: Function evaluate error from AMPL.

<sup>3</sup> §: Solver terminates with a near optimal status.

<sup>4</sup> ◇: Ipopt fails in restoration phase.

**Table 15** Comparison with MOSEK, Ipopt, and Knitro on CP infeasible test problems
